# Supplementary material for: Retrospective cross-sectional analysis of the changes in marijuana use in the USA, 2005–2018
Source: PubMed Central journal article supplement — BMJ Open. 2020 Jul 28;10(7):e037905. doi: 10.1136/bmjopen-2020-037905 (PMC7389483; doi:10.1136/bmjopen-2020-037905), 2020-07-28
Supplement: bmjopen-2020-037905.draft_revisions.pdf [file bmjopen-2020-037905.draft_revisions.pdf]

# BMJ Open

BMJ Open is committed to open peer review. As part of this commitment we make the peer review history of every article we publish publicly available.

When an article is published we post the peer reviewers' comments and the authors' responses online. We also post the versions of the paper that were used during peer review. These are the versions that the peer review comments apply to.

The versions of the paper that follow are the versions that were submitted during the peer review process. They are not the versions of record or the final published versions. They should not be cited or distributed as the published version of this manuscript.

BMJ Open is an open access journal and the full, final, typeset and author-corrected version of record of the manuscript is available on our site with no access controls, subscription charges or pay-per-view fees (<http://bmjopen.bmj.com>).

If you have any questions on BMJ Open's open peer review process please email [info.bmjopen@bmj.com](mailto:info.bmjopen@bmj.com)

# BMJ Open

## Demographic Changes in the Prevalence of Marijuana use in the United States, 2005 to 2016

|                               |                                                                                                                                                                                                                |
|-------------------------------|----------------------------------------------------------------------------------------------------------------------------------------------------------------------------------------------------------------|
| Journal:                      | <i>BMJ Open</i>                                                                                                                                                                                                |
| Manuscript ID                 | bmjopen-2020-037905                                                                                                                                                                                            |
| Article Type:                 | Original research                                                                                                                                                                                              |
| Date Submitted by the Author: | 21-Feb-2020                                                                                                                                                                                                    |
| Complete List of Authors:     | Mitchell, William; Harvard University, Harvard School of Public Health<br>Bhatia, Roma; Beth Israel Deaconess Medical Center<br>Zebardast, Nazlee; Massachusetts Eye and Ear Infirmary; Harvard Medical School |
| Keywords:                     | PUBLIC HEALTH, Substance misuse < PSYCHIATRY, Health policy < HEALTH SERVICES ADMINISTRATION & MANAGEMENT                                                                                                      |
|                               |                                                                                                                                                                                                                |

SCHOLARONE™  
Manuscripts

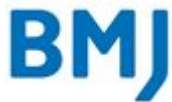

I, the Submitting Author has the right to grant and does grant on behalf of all authors of the Work (as defined in the below author licence), an exclusive licence and/or a non-exclusive licence for contributions from authors who are: i) UK Crown employees; ii) where BMJ has agreed a CC-BY licence shall apply, and/or iii) in accordance with the terms applicable for US Federal Government officers or employees acting as part of their official duties; on a worldwide, perpetual, irrevocable, royalty-free basis to BMJ Publishing Group Ltd ("BMJ") its licensees and where the relevant Journal is co-owned by BMJ to the co-owners of the Journal, to publish the Work in this journal and any other BMJ products and to exploit all rights, as set out in our [licence](#).

The Submitting Author accepts and understands that any supply made under these terms is made by BMJ to the Submitting Author unless you are acting as an employee on behalf of your employer or a postgraduate student of an affiliated institution which is paying any applicable article publishing charge ("APC") for Open Access articles. Where the Submitting Author wishes to make the Work available on an Open Access basis (and intends to pay the relevant APC), the terms of reuse of such Open Access shall be governed by a Creative Commons licence – details of these licences and which [Creative Commons](#) licence will apply to this Work are set out in our licence referred to above.

Other than as permitted in any relevant BMJ Author's Self Archiving Policies, I confirm this Work has not been accepted for publication elsewhere, is not being considered for publication elsewhere and does not duplicate material already published. I confirm all authors consent to publication of this Work and authorise the granting of this licence.

**Title**

---

Demographic Changes in the Prevalence of Marijuana use in the United States, 2005 to 2016.

**Author Details**

---

1. William Mitchell MBBS GDipClinEd  
Master of Public Health student, Harvard T.H. Chan School of Public Health  
Corresponding author: (email: william.greig.mitchell@gmail.com; mobile: 617 803 4823)
2. Roma Bhatia MD  
General Internal Medicine Fellow, Beth Israel Deaconess Medical Centre, Harvard Medical School
3. Nazlee Zebardast MD MSc FRCSC  
Instructor of Ophthalmology, Glaucoma Specialist, Massachusetts Eye and Ear Infirmary

**Word count**

---

Abstract: 284 words

Article summary: 114 words

Manuscript: 1,925 words

**Key words**

---

Marijuana, marijuana use, drug use, illicit, legalization

## Abstract

---

**Importance:** Understanding trends of marijuana use in the United States (US) throughout a period of particularly high adoption of marijuana legalization, and understanding which demographics are most at risk of use, is important in managing evolving healthcare policy and intervention.

**Objective:** To study the demographic-specific changes in the prevalence of marijuana use in the US between 2005-2016.

**Design, Setting and Participants:** Analysis of National Health and Nutrition Examination Survey weighted US survey data. A total of 30,402 adults between 18-69 years old participated between January 2005-December 2016.

**Primary Outcome Measured:** Lifetime use, recent use and use in adolescence of marijuana.

**Results:** The majority of US adults reported ever using marijuana. While the overall prevalence of lifetime marijuana use remained stable ( $p=0.17$ ), recent use increased significantly between 2005 and 2016 ( $p=0.01$ ) with highest rate of recent use among younger age groups ( $p<0.001$ ), males ( $p<0.001$ ), and those with income below poverty level ( $p<0.001$ ). Recent marijuana use was most common among non-Hispanic blacks, and less common among Hispanic/Mexican populations ( $p<0.05$ ). Trends in recent use increased among older adults ( $p<0.001$ ), females ( $p=0.003$ ), and those with high school education or above ( $p=0.04$ ).

**Conclusions:** While lifetime marijuana use remained stable, recent use significantly increased over the 12-year period. While recent use was remained commonest in younger age groups, males, non-Hispanic blacks and those with lower income; increasing trends in recent use were significant for older, female, and highly-educated populations. With high legalization adoption during this period, our results may suggest an associated increase in recent marijuana use.

An accurate understanding of those most at risk can help inform decisions of healthcare policy makers and healthcare professionals, and facilitate a safe transition of changing marijuana legalization and use in the US.

## Article Summary

---

- This is the most recent study of trends of marijuana use in the United States, during a period of particularly high rates of adoption of marijuana legalization laws.
- The National Health and Nutrition Examination Survey (NHANES) database is a publicly-available and nation-wide database. The NHANES database is weighted (standardized), to accurately represent the entire population of the United States.
- The NHANES database is self-reported, and limited by reporter bias.
- Missing data was primarily from participants who were older and female, potentially underestimating the true prevalence of marijuana use among this demographic.
- State-based legalization information was not available, and could not be accurately correlated to changing trends of marijuana use.

## Manuscript

---

### Introduction:

While remaining illegal at the federal level in the United States (US), marijuana is now legal for recreational use by adults over the age of 21 in 11 states, and for medical use in 33 states (1, 2). With particularly high adoption rates of medical marijuana legalization between 2007 and 2016 (3), and increasing social acceptability of marijuana use (4-6), describing trends in use among different demographics in the US is important in understanding which populations might be most affected by changing laws.

Prior studies have described increases in both marijuana use and misuse trends since medical marijuana legalisation (4, 7, 8) in marijuana users both domestically and overseas (9, 10). However, some studies have shown no changes to trends of recent use since legalisation (11, 12), and others have shown only increases in marijuana misuse (12). A recent analysis even described a significant decrease in marijuana misuse disorder since legalisation (13). There have also been inconsistent reports of the demographics of those most affected by changing medical and recreational marijuana legalisation; some studies describing increasing trends across all gender, age and ethnic demographics (7), some showing trend changes particularly for young, black, and Hispanic men (12), and others showing changes particularly among older individuals (4, 6, 14). Importantly, changing trends in medical and non-medical marijuana use do not appear to be restricted only to states with changing marijuana laws (15), despite being higher in states where laws have been passed (7). An understanding of both the social and the economic cost-effectiveness of legalising marijuana (16, 17), coupled with an understanding of trends of changing use, may be useful for those working in public health, public policy, and healthcare, responsible for policy intervention or caring for populations most affected by marijuana use.

The current paper uses data from the US National Health and Nutrition Examination Survey (NHANES), a nationally-representative sample of US adults, to examine the most recent 12-year trends in marijuana use in the United States. Additionally, we examine sociodemographic factors associated with marijuana use. We explore recent literature regarding the cost-effectiveness of medical and social marijuana legalization, adding to the current body of literature important for those in policy, or caring for those most affected.

### Methods:

The National Health and Nutrition Examination Survey (NHANES) is an on-going biennial cross-sectional survey representing a non-institutionalized civilian US population, performed by the National Centre for Health Statistics and Centres for Disease Control and Prevention.

1  
2  
3 Participants undergo a home interview and a comprehensive physical examination in  
4 a mobile examination centre (MEC). The 2005-2016 NHANES protocol was approved by the  
5 National Centre for Health Statistics research ethics review board and written informed  
6 consent obtained from all participants.  
7  
8  
9

10 Demographics data including age, gender, race/ethnicity, education and income were  
11 collected during the home interview. The drug use questionnaire was conducted in the MEC  
12 and aimed to assess lifetime and current usage of illicit drugs. Questions are self-administered  
13 using the Audio Computer-Assisted Self-Interview (ACASI) system. The ACASI was conducted  
14 in English, Spanish, Korean, Vietnamese, or Chinese (Mandarin and Cantonese). Participants  
15 reported lifetime use, age at first use and use within prior 12 months of marijuana. We  
16 defined *recent use* as any survey responses stating use within the previous 12 months.  
17  
18  
19

20  
21 All analyses were restricted to adults aged 18 to 69 years. Given the NHANES complex  
22 probability sampling design, 2-year interview weights computed by the National Center for  
23 Health Statistics were used to calculate prevalence estimates and 95% confidence interval.  
24 Differences in prevalence estimates were compared using chi-square tests. Univariate  
25 regression models were used to test for significant linear trends while multivariable  
26 regression models were used to determine characteristics associated with recent marijuana  
27 use. Statistical analysis was performed using STATA (version 15).  
28  
29  
30

31  
32 Patients or the public were not involved in the design, or conduct, or reporting, or  
33 dissemination plans of our research.  
34  
35  
36  
37

### 38 **Results:**

39  
40 A total of 30,402 adults between 18-69 years old participated in NHANES 2005-2016 surveys.  
41 Of these 9,987 (27.13%) had missing survey data. Those with missing data were significantly  
42 more likely to be older ( $p<0.001$ ), female ( $p<0.001$ ) and have less than high school education  
43 ( $p<0.001$ ).  
44  
45  
46  
47

48 Overall, 59.2% (CI 57.7% - 60.7%) of the US adult population reported ever using marijuana  
49 between 2005-2016. The prevalence of lifetime marijuana use remained stable between 2005  
50 and 2016 ( $p=0.17$ ) (Table 1). Overall 18.8% (CI 15.2-23.5) of US adults reported using  
51 marijuana within the last year. The weighted prevalence of recent marijuana use increased  
52 significantly during the study period from 19.1% (95% CI 15.3-23.7%) in 2005/06 to 24.9%  
53 (95%CI 20.0-30.5) ( $p=0.02$ ) in 2015/16.  
54  
55  
56  
57

58 The prevalence of recent marijuana use was higher among younger age groups ( $p<0.001$ ),  
59 males ( $p<0.001$ ), and those with income below poverty level ( $p<0.001$ ) (Table 2). Recent  
60



1  
2  
3 marijuana use was more common among non-Hispanic blacks, and less common among  
4 Hispanic/Mexicans ( $p < 0.002$  (excluding 2011-2012)). Between 2005 - 2016 the prevalence of  
5 recent marijuana use increased among older adults (age 50-69,  $p < 0.001$ ), females ( $p = 0.003$ ),  
6 all racial categories ( $p < 0.05$  for all groups), and those with high school education or above  
7 ( $p = 0.04$  for both)  
8  
9

10  
11 Multivariate logistic regression analysis demonstrated higher odds of recent marijuana use  
12 among males ( $p < 0.001$ ), non-Hispanic blacks ( $p = 0.008$ ) and those with income within 2x or  
13 below the poverty level ( $p < 0.001$  for both) (Table 3). Recent use was less likely among older  
14 individuals ( $p < 0.001$ ), Hispanic and Mexican Americans ( $p < 0.001$ ) and those with more than  
15 high school education ( $p < 0.001$ ) (Table 3).  
16  
17  
18  
19  
20  
21

## 22 **Discussion:**

23  
24 While lifetime marijuana use remained stable, overall prevalence of recent use within the  
25 previous 12-months significantly increased over the 12-year period. While recent use was  
26 more common in younger age groups, males, non-Hispanic blacks and those with lower  
27 income, significant trends of increasing recent use were most notable for older, female, and  
28 highly-educated populations.  
29  
30  
31

32  
33 Our demographic findings of those most likely to have used marijuana are consistent with  
34 previous studies, demonstrating highest overall use among younger, males, non-Hispanic  
35 blacks, and lower income groups (4, 7). Native American populations, those living in urban  
36 areas, and those living in western states, have also been shown to be more likely to have  
37 recently used marijuana; but these demographic factors were not included in our analyses.  
38 The characteristics of those most likely to have used medical-marijuana have been shown to  
39 be altogether different; tending to be in slightly older age groups (30-50 years old), males,  
40 white, and with higher annual incomes (15).  
41  
42  
43  
44

45  
46 Particularly high uptake of medical and recreational marijuana legalization in the US between  
47 2007-2016 (3), with paralleled increasing marijuana-use trends particularly during this period  
48 (4), may suggest an association between marijuana legalization and use. However, specific  
49 demographics most affected by changing laws, whether recreational or medical users are  
50 more affected, and changes in marijuana misuse trends, remain inconsistently described (12).  
51 Where previous studies have concluded comparably increased use across ages and gender (4,  
52 6, 7, 12), changing trends in adolescents remains unclear. While younger people have  
53 appeared likelier to use recreational marijuana after legalization in some instances (8), Harpin  
54 and colleagues describe no significant change to use among college students after legalization  
55 (despite changes to perceived ease of access) (11), supported by more recent reviews  
56 describing stable adolescent trends (6). In fact, a recent study describes that recent marijuana  
57  
58  
59  
60

1  
2  
3 misuse appears to have *decreased* among US adolescents during the highest periods of  
4 legalization uptake (13). More recent reviews outline that marijuana legalization results in  
5 significantly increased use in older populations only, without affecting adolescents (6, 14);  
6 corroborated by recent findings by Salas-Wright and colleagues demonstrating increasing  
7 trends of recent use among late middle-aged adults between 2002-2014 (5). The extent to  
8 which different demographics remain most at risk of medical or recreational use or misuse  
9 remains unclear.  
10  
11  
12  
13

14 Importantly, increasing trends of marijuana use appears not to be restricted to states with  
15 changing legalization laws. Hasin and colleagues demonstrate significantly increased use seen  
16 both in states with and without marijuana legalization (4, 7), albeit fractionally higher in states  
17 where marijuana was legalized. However, a recent analysis by Han and colleagues  
18 demonstrated a significantly higher trend of increasing medical marijuana use in states  
19 without legalization (AOR 1.4, 95% CI 1.05-1.90), compared to states with legalization (AOR  
20 1.3, 95% CI 1.03-1.61) (15). This underlines the fact that evolving legalization laws are also of  
21 relevance to states where recreational and medical marijuana use remains illegal.  
22  
23  
24  
25  
26

27 In addition to demographic risk factors indicating potential marijuana use, an understanding  
28 of other risk factors is important for those involved in fields of public policy and healthcare.  
29 While age and gender remain somewhat inconsistently described risk factors, tobacco  
30 smoking has been demonstrated a significant risk factor for marijuana use. A recent study  
31 demonstrated that current smokers have almost 6x increased odds of recent marijuana use  
32 compared to non-smokers (18), outlining another sub-population particularly at risk. Another  
33 group at risk of increasing marijuana use are non-medical users of prescription drugs  
34 (NMUPD). A recent study by Karjalainen and colleagues demonstrated significantly increasing  
35 trends of illicit drug use among NMUPD (92% of whom had used cannabis in the last year),  
36 that could not otherwise be explained by age or gender (19).  
37  
38  
39  
40  
41  
42

43 Exploring the economic and societal cost-effectiveness of marijuana legalization is important  
44 for those involved in healthcare policy and decision making. Marijuana legalization was  
45 posited to lower price, increase availability, and thereby increase marijuana use (6), with early  
46 fears that profit motive would take precedence over public health issues (20, 21). The retail  
47 price of marijuana on the legal cannabis market had sharply fallen by almost 70%, just three-  
48 years after legalization in Washington State (22, 23). Some reports described an initial  
49 increase in self-reported street prices of marijuana in response to legalization as demand  
50 increased, by up to 36% (24), with limited price change thereafter. However, similarly to  
51 results aforementioned, medical legalization appears to have affected only adult marijuana  
52 use, with minimal significant changes to adolescent use (14). While studies of the effect of  
53 recreational marijuana legalization on its use are still emerging, there appears to be  
54 no/minimal effect on adolescent or college marijuana use (14). The passage of legalization  
55 laws also offers an important social justice benefit (25); by removing mechanisms for unfair,  
56  
57  
58  
59  
60

1  
2  
3  
4  
5  
6  
7  
8  
9  
10  
11  
12  
13  
14  
15  
16  
17  
18  
19  
20  
21  
22  
23  
24  
25  
26  
27  
28  
29  
30  
31  
32  
33  
34  
35  
36  
37  
38  
39  
40  
41  
42  
43  
44  
45  
46  
47  
48  
49  
50  
51  
52  
53  
54  
55  
56  
57  
58  
59  
60

damaging disparities in law enforcement (26). While more permissive marijuana laws may appeal to social justice aims (reducing racial disparity in law enforcement), and increase revenue to state and local government through taxation (6), the public health trade-offs and overall costs of use-related adverse physical and psychosocial consequences (27) in response to changing laws remains difficult to accurately describe (6).

Strengths and Limitations: Limitations to our study include reliance on self-reported data and reporter-bias. Missing data was primarily from participants who were older and female, potentially underestimating the true prevalence of marijuana use among this demographic. Our dataset excluded youth aged 12-17 years old, a potentially at-risk population. Strengths of our study include the size and heterogeneity of our population, the timespan, and the standardization of the NHANES data.

### **Conclusion:**

Our primary two findings describing characteristics of those most at risk of using marijuana, and those where trends of use have most significantly increased, adds to the current body of literature and understanding of marijuana trends in the United States. Given ongoing changes to legalization in the US, with the evolving public perception of marijuana safety and accessibility, an accurate understanding of which populations are most likely to be implicated, which additional predictive tools can identify those most at risk, and a balanced presentation of healthcare, social and economic costs of legalization, is warranted. Identification of these factors can help inform the decisions of healthcare policy makers and professionals, and facilitate a safe transition of changing marijuana legalization and use in the US.

**Author statements:**

There are no competing or conflicting interests to declare by any of the authors.

**Funding:**

This research received no specific grant from any funding agency in the public, commercial or not-for-profit sector.

**Author contributions:**

Dr William Mitchell: Analysis plan, data interpretation, manuscript generation and editing, submission, correspondence

Dr Roma Bhatia: Analysis plan, data interpretation, manuscript editing

Dr Nazlee Zebardast: Analysis plan, data extraction, analysis and interpretation, manuscript editing

**Data Statement:**

Data is fully accessible from the following website:

<https://wwwn.cdc.gov/nchs/nhanes/default.aspx>

## References

---

1. Cohn A, Johnson A, Rose S, Rath J, Villanti A. Support for Marijuana Legalization and Predictors of Intentions to Use Marijuana More Often in Response to Legalization Among U.S. Young Adults. *Substance Use and Misuse*. 2017;52(2):203-13.
2. Berke J, Gould S. Legal marijuana just went on sale in Illinois. Here are all the states where cannabis is legal *Business Insider: Business Insider*; 2020 [Available from: <https://www.businessinsider.com/legal-marijuana-states-2018-1>].
3. State Medical Marijuana Laws: NCSL; 2019 [Available from: <http://www.ncsl.org/research/health/state-medical-marijuana-laws.aspx>].
4. Hasin D, Saha T, Kerridge B, Goldstein R, Chou P, Zhang H, et al. Prevalence of Marijuana Use Disorders in the United States Between 2001–2002 and 2012–2013. *JAMA Psychiatry*. 2015;72(12):1235-42.
5. Salas-Wright C, Vaughn M, Cummings-Vaughn L, Holzer K, Nelson E, AbiNader M, et al. Trends and correlates of marijuana use among late middle-aged and older adults in the United States, 2002–2014. *Drug and Alcohol Dependence*. 2017;1(171):97-106.
6. Carliner H, Brown Q, Sarvet A, Hasin D. Cannabis use, attitudes, and legal status in the U.S.: A review. *Preventative Medicine*. 2017;104:13-23.
7. Hasin D, Sarvet A, Cerdá M, Keyes K, Stohl M, Galea S, et al. US Adult Illicit Cannabis Use, Cannabis Use Disorder, and Medical Marijuana Laws: 1991-1992 to 2012-2013. *JAMA Psychiatry*. 2017;74(6):579-88.
8. Bae H, Kerr D. Marijuana use trends among college students in states with and without legalization of recreational use: initial and longer-term changes from 2008 to 2018. *Addiction*. 2019.
9. Karjalainen K, Savonen J, Hakkarainen P. Drug Use and Drug Attitudes Among Finns - Drug Related Population Surveys in Finland 1992-2014. Helsinki, Finland: National Institute for Health and Welfare; 2016.
10. Fingerhut L. Increases in poisoning and methadone-related deaths: United States, 1999-2005. : Centers for Disease Control and Prevention; 2008 [Available from: <http://www.cdc.gov/nchs/data/hestat/poisoning/poisoning.pdf>].
11. Harpin S, Brooks-Russell A, Ma M, James K, Levinson A. Adolescent Marijuana Use and Perceived Ease of Access Before and After Recreational Marijuana Implementation in Colorado. *Substance Use and Misuse*. 2017;53(3):451-6.
12. Compton W, Grant B, Colliver J, Glantz M, Stinson F. Prevalence of Marijuana Use Disorders in the United States 1992-1992 and 2001-2002. *JAMA Network*. 2004;291:2114-21.
13. Grucza R, Agrawal A, Krauss M, Bongu J, Plunk A, Cavazos-Rehg P, et al. Declining Prevalence of Marijuana Use Disorders Among Adolescents in the United States, 2002–2013. *J Am Acad Child Adolesc Psychiatry*. 2016;55(6).
14. Smart R, Pacula R. Early evidence of the impact of cannabis legalization on cannabis use, cannabis use disorder, and the use of other substances: Findings from state policy evaluations. *American Journal of Drug and Alcohol Abuse*. 2019;45(6):644-63.
15. Han B, Compton W, Blanco C, Jones C. Trends in and correlates of medical marijuana use among adults in the United States. *Drug and Alcohol Dependence*. 2018;186:120-9.
16. Shanahan M, Ritter A. Cost Benefit Analysis of Two Policy Options for Cannabis: Status Quo and Legalisation. *PLoS ONE*. 2014;9(4):e95569.

17. Tyree G, Sarkar R, Bellows B, Ellis R, Atkinson J, Marcotte T, et al. A Cost-Effectiveness Model for Adjunctive Smoked Cannabis in the Treatment of Chronic Neuropathic Pain. *Cannabis and Cannabinoid Research*. 2019;4(1):62-72.
18. Moeller S, Fink D, Gbedemah M, Hasin D, Galea S, Zvolensky M, et al. Trends in illicit drug use among smokers and non-smokers in the United States, 2002–2014. *Journal of Clinical Psychiatry*. 2018;79(3).
19. Karjalainen K, Lintonen T, Hakkarainen P. Illicit drug use is increasing among non-medical users of prescription drugs—Results from population-based surveys 2002–2014. *Drug and Alcohol Dependence*. 2017;178:430-4.
20. Pacula R, Kilmer B, Wagenaar A, Chaloupka F, Caulkins J. Developing public health regulations for marijuana: lessons from alcohol and tobacco. *American Journal of Public Health*. 2014;104:1021-8.
21. Room R. Legalizing a market for cannabis for pleasure: Colorado, Washington, Uruguay and beyond. *Addiction*. 2014;109:345-51.
22. Humphreys K. How legalization caused the price of marijuana to collapse *Washington Post: Washington post*; 2017 [Available from: <https://www.washingtonpost.com/news/wonk/wp/2017/09/05/how-legalization-caused-the-price-of-marijuana-to-collapse/>].
23. Smart R, Caulkins J, Kilmer B, Davenport S, Midgette G. VARIATION IN CANNABIS POTENCY & PRICES IN A NEWLY-LEGAL MARKET: Evidence from 30 million cannabis sales in Washington State. *Addiction*. 2017;112(12):2167-77.
24. Hunt P, Pacula R. Early Impacts of Marijuana Legalization: An Evaluation of Prices in Colorado and Washington. *Journal of Primary Prevention*. 2017;38(3):221-48.
25. Jensen E, Roussel A. Field observations of the developing legal recreational cannabis economy in Washington State. *International Journal of Drug Policy*. 2016;33:96-101.
26. Golub A, Johnson B, Dunlap E. The race/ethnicity disparity in misdemeanor marijuana arrests in New York City. *Criminology and Public Policy*. 2007;6:131-64.
27. Hall W. Alcohol and cannabis: comparing their adverse health effects and regulatory regimes. *International Journal of Drug Policy*. 2017;42:57-62.

Table 1: Prevalence of marijuana and cocaine/heroin/methamphetamine use in US adults, NHANES 2005-2016

|                                             | 2005-2006 |                       | 2007-2008 |                       | 2009-2010 |                       | 2011-2012 |                       | 2013-2014 |                       | 2015-2016 |                       | P    |
|---------------------------------------------|-----------|-----------------------|-----------|-----------------------|-----------|-----------------------|-----------|-----------------------|-----------|-----------------------|-----------|-----------------------|------|
|                                             | Total N   | Prevalence % (95% CI) |      |
| <b>Lifetime use</b>                         | 2922      | 61.5<br>(57.2-65.7)   | 3255      | 60.5<br>(57.2-63.7)   | 3739      | 57.2<br>(53.0-61.3)   | 3333      | 59.9<br>(56.0-63.6)   | 3690      | 59.2<br>(55.6-62.7)   | 3422      | 57.3<br>(53.1-61.5)   | 0.17 |
| <b>Age at First used (&lt;18 years old)</b> | 1617      | 59.6<br>(56-7-62.7)   | 1799      | 60.7<br>(58.0-63.5)   | 1937      | 62.7<br>(59.0-66.4)   | 1770      | 60.1<br>(56.0-64.0)   | 1984      | 61.4<br>(58.8-63.9)   | 1715      | 60.1<br>(56.5-63.7)   | 0.91 |
| <b>Recent use (≤ 12 months)</b>             | 2922      | 19.1<br>(15.3-23.7)   | 3255      | 19.1<br>(17.5-20.7)   | 3739      | 20.6<br>(18.2-23.3)   | 3333      | 22.4<br>(19.8 - 25.2) | 3690      | 22.3<br>(19.9-24.8)   | 3422      | 24.9<br>(20.0-30.6)   | 0.02 |

Key:  
 N denotes unweighted total number of participants in each category  
 Prevalence percentage with 95% (CI), computed using 2-year MEC weights to provide estimates for the total US population, and age-standardized to 2000 Census population.  
 P values test overall trend in prevalence estimates in each category  
 NHANES = National Health and Nutrition Examination Survey

Table 2: Prevalence of self-reported recent marijuana use by demographic factors, NHANES 2005-2016.

|                            | 2005-2006                               | 2007-2008                   | 2009-2010                   | 2011-2012                   | 2013-2014                   | 2015-2016                   | P value             |
|----------------------------|-----------------------------------------|-----------------------------|-----------------------------|-----------------------------|-----------------------------|-----------------------------|---------------------|
|                            | Prevalence % (95% CI)                   | Prevalence % (95% CI)       | Prevalence % (95% CI)       | Prevalence % (95% CI)       | Prevalence % (95% CI)       | Prevalence % (95% CI)       |                     |
| <b>Age of participants</b> |                                         |                             |                             |                             |                             |                             |                     |
| - 18-29                    | 34.0 <sup>a</sup> (26.7-42.0)           | 35.1 (30.0-40.6)            | 34.4 (30.7-38.3)            | 36.2 (31.7-41.1)            | 38.1 (35.1-41.2)            | 37.3 (30.4-44.8)            | P=0.28 <sup>c</sup> |
| - 30-49                    | 16.1 (12.3-20.7)                        | 16.2 (14.3-18.2)            | 17.5 (14.7-20.7)            | 17.0 (14.4-20.1)            | 16.3 (13.8-19.1)            | 21.1 (16.0-27.3)            | P=0.15              |
| - 50-69                    | 10.5 (7.4-14.6)<br>P<0.001 <sup>b</sup> | 8.1 (6.0-10.9)<br>P<0.001   | 10.3 (7.8-13.4)<br>P<0.001  | 15.5 (11.4-20.8)<br>P<0.001 | 14.3 (9.2-21.5)<br>P<0.001  | 18.0 (13.0-23.7)<br>P<0.001 | P<0.001             |
| <b>Gender</b>              |                                         |                             |                             |                             |                             |                             |                     |
| - Male                     | 24.8 (20.3-29.9)                        | 23.1 (20.8-25.7)            | 24.8 (22.0-27.8)            | 27.3 (24.6-30.1)            | 26.3 (23.2-29.7)            | 29.2 (23.1-36.3)            | P=0.09              |
| - Female                   | 13.6 (10.1-18.1)<br>P<0.001             | 15.1 (13.1-17.3)<br>P<0.001 | 16.3 (13.6-19.3)<br>P<0.001 | 17.3 (14.0-21.2)<br>P<0.001 | 18.2 (15.3-21.6)<br>P=0.001 | 20.6 (16.5-25.4)<br>P<0.001 | P=0.003             |
| <b>Race</b>                |                                         |                             |                             |                             |                             |                             |                     |
| - Non-Hispanic White       | 20.1 (15.6-25.7)                        | 19.4 (17.7-21.3)            | 21.1 (18.4-24.1)            | 22.7 (19.4-26.3)            | 22.0 (18.3-26.3)            | 26.7 (20.4-34.1)            | P=0.049             |
| - Non-Hispanic Black       | 23.56 (18.4-29.1)                       | 26.9 (22.6-31.7)            | 27.6 (24.6-30.9)            | 27.3 (22.1-33.2)            | 32.9 (29.8-36.1)            | 32.5 (28.8-36.5)            | P=0.001             |
| - Hispanic/Mexican         | 11.7 (8.3-16.2)                         | 13.6 (9.8-18.5)             | 16.6 (13.0-20.9)            | 18.9 (15.2-23.2)            | 17.9 (15.5-20.6)            | 16.3 (13.1-20.2)            | P=0.03              |
| - Other                    | 13.2(7.9-21.2)<br>P=0.003               | 13.3 (7.5-22.6)<br>P=0.002  | 12.7 (7.4-21.1)<br>P<0.001  | 18.7 (14.2-24.1)<br>P=0.06  | 18.0 (13.7-23.3)<br>P<0.001 | 19.9 (13.3-28.7)<br>P=0.001 | P=0.06              |
| <b>Educat.</b>             |                                         |                             |                             |                             |                             |                             |                     |
| - <High School             | 22.5 (16.5-30.0)                        | 22.1 (17.6-27.3)            | 23.3 (19.5-27.6)            | 27.5 (22.6-33.0)            | 27.9 (23.6-32.6)            | 24.7 (20.0-30.1)            | P=0.13              |
| - High School              | 21.6 (15.1-30.0)                        | 19.6 (17.5-21.8)            | 24.7 (21.2-28.5)            | 25.8 (20.8-31.5)            | 25.4 (21.1-30.3)            | 27.5 (22.3-33.4)            | P=0.04              |
| - >High School             | 17.4 (13.2-22.7)<br>P=0.25              | 18.0 (15.4-20.8)<br>P=0.21  | 18.2 (15.1-21.9)<br>P=0.006 | 20.2 (17.2-23.4)<br>P=0.01  | 19.8 (16.9-23.0)<br>P=0.01  | 24.1 (18.2-31.3)<br>P=0.42  | P=0.04              |
| <b>Poverty</b>             |                                         |                             |                             |                             |                             |                             |                     |
| - >2x Poverty Level        | 17.7 (13.5-22.8)                        | 16.3 (14.4-18.5)            | 17.1 (14.2-20.5)            | 18.3 (15.6-21.3)            | 18.5 (15.7-21.6)            | 22.4 (17.3-28.4)            | P=0.09              |
| - 1-2X Poverty Level       | 22.0 (16.4-28.8)                        | 24.5 (20.8-28.6)            | 22.4 (18.0-27.7)            | 27.9 (23.8-32.3)            | 25.3 (21.6-29.5)            | 29.4 (21.8-38.4)            | P=0.08              |
| - < Poverty Level          | 24.3 (19.2-30.2)<br>P=0.05              | 25.2 (19.5-32.0)<br>P=0.001 | 34.6 (30.9-38.6)<br>P<0.001 | 31.1 (27.1-35.4)<br>P<0.001 | 33.2 (28.3-38.6)<br>P<0.001 | 29.8 (23.6-37.0)<br>P=0.004 | P=0.07              |

**Key:**

Prevalence percentage with 95% confidence intervals (CI), computed using 2-year interview weights to provide estimates for the total US population and are age-standardized to the US 2000 Census population.

<sup>a</sup> percentage interpretation: of those aged 18-29, 34% reported marijuana use within the past 12 months. Poverty defined using poverty income ratio, accounting for family size

<sup>b</sup> P values test global within group differences in prevalence

<sup>c</sup> P values test overall trend in prevalence estimates in each category

NHANES = National Health and Nutrition Examination Survey



**Table 3: Multivariable logistic regression analysis predicting recent marijuana use within the past 12 months NHANES 2005-2016**

| Demographic variable       | Recent marijuana use (past 12 months)<br>OR (95% CI) |
|----------------------------|------------------------------------------------------|
| <b>Age of participants</b> |                                                      |
| - 18-29                    | 1.0 (reference)                                      |
| - 30-49                    | 0.39 (0.35-0.43)                                     |
| - 50-69                    | 0.27 (0.23-0.31)                                     |
| <b>Gender</b>              |                                                      |
| - Female                   | 1.0 (reference)                                      |
| - Male                     | 1.77 (1.62-1.92)                                     |
| <b>Race</b>                |                                                      |
| - Non-Hispanic White       | 1.0 (reference)                                      |
| - Non-Hispanic Black       | 1.20 (1.05-1.38)                                     |
| - Hispanic/Mexican         | 0.47 (0.41-0.55)                                     |
| - Other                    | 0.63 (0.53-0.75)                                     |
| <b>Education</b>           |                                                      |
| - < High School            | 1.0 (reference)                                      |
| - High School              | 0.93 (0.79-1.10)                                     |
| - > High School            | 0.81 (0.70-0.92)                                     |
| <b>Poverty</b>             |                                                      |
| - >2x Poverty Level        | 1.0 (reference)                                      |
| - 1-2X Poverty Level       | 1.41 (1.24-1.59)                                     |
| - < Poverty Level          | 1.69 (1.49-1.92)                                     |

**Key:**

Odds ratio (OR) with 95% confidence intervals (CI) computed using 12-year interview weights to provide estimates for the total US population and are age-standardized to the US 2000 Census population.

Poverty defined using poverty income ratio, which accounts for family size

NHANES = National Health and Nutrition Examination Survey

1  
2  
3  
4  
5  
6  
7  
8  
9  
10  
11  
12  
13  
14  
15  
16  
17  
18  
19  
20  
21  
22  
23  
24  
25  
26  
27  
28  
29  
30  
31  
32  
33  
34  
35  
36  
37  
38  
39  
40  
41  
42  
43  
44  
45  
46

For peer review only

# BMJ Open

## A Retrospective Cross-Sectional Analysis of the Changes in Marijuana Use in the United States, 2005-2018

|                                 |                                                                                                                                                                                                                |
|---------------------------------|----------------------------------------------------------------------------------------------------------------------------------------------------------------------------------------------------------------|
| Journal:                        | <i>BMJ Open</i>                                                                                                                                                                                                |
| Manuscript ID                   | bmjopen-2020-037905.R1                                                                                                                                                                                         |
| Article Type:                   | Original research                                                                                                                                                                                              |
| Date Submitted by the Author:   | 28-Apr-2020                                                                                                                                                                                                    |
| Complete List of Authors:       | Mitchell, William; Harvard University, Harvard School of Public Health<br>Bhatia, Roma; Beth Israel Deaconess Medical Center<br>Zebardast, Nazlee; Massachusetts Eye and Ear Infirmary; Harvard Medical School |
| <b>Primary Subject Heading</b>: | Public health                                                                                                                                                                                                  |
| Secondary Subject Heading:      | Public health                                                                                                                                                                                                  |
| Keywords:                       | PUBLIC HEALTH, Substance misuse < PSYCHIATRY, Health policy < HEALTH SERVICES ADMINISTRATION & MANAGEMENT                                                                                                      |
|                                 |                                                                                                                                                                                                                |

SCHOLARONE™  
Manuscripts

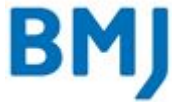

I, the Submitting Author has the right to grant and does grant on behalf of all authors of the Work (as defined in the below author licence), an exclusive licence and/or a non-exclusive licence for contributions from authors who are: i) UK Crown employees; ii) where BMJ has agreed a CC-BY licence shall apply, and/or iii) in accordance with the terms applicable for US Federal Government officers or employees acting as part of their official duties; on a worldwide, perpetual, irrevocable, royalty-free basis to BMJ Publishing Group Ltd ("BMJ") its licensees and where the relevant Journal is co-owned by BMJ to the co-owners of the Journal, to publish the Work in this journal and any other BMJ products and to exploit all rights, as set out in our [licence](#).

The Submitting Author accepts and understands that any supply made under these terms is made by BMJ to the Submitting Author unless you are acting as an employee on behalf of your employer or a postgraduate student of an affiliated institution which is paying any applicable article publishing charge ("APC") for Open Access articles. Where the Submitting Author wishes to make the Work available on an Open Access basis (and intends to pay the relevant APC), the terms of reuse of such Open Access shall be governed by a Creative Commons licence – details of these licences and which [Creative Commons](#) licence will apply to this Work are set out in our licence referred to above.

Other than as permitted in any relevant BMJ Author's Self Archiving Policies, I confirm this Work has not been accepted for publication elsewhere, is not being considered for publication elsewhere and does not duplicate material already published. I confirm all authors consent to publication of this Work and authorise the granting of this licence.

1  
2  
3 1 **Title**  
4  
5  
6

---

7 3 **A Retrospective Cross-Sectional Analysis of the Changes in Marijuana Use in the United States, 2005-**  
8 **2018**  
9

10  
11  
12 6 **Author Details**  
13

---

- 14 7  
15  
16 8 1. William Mitchell MBBS GDipClinEd  
17  
18 9 Master of Public Health student, Harvard T.H. Chan School of Public Health  
19  
20 10 Corresponding author: (email: william.greig.mitchell@gmail.com; mobile: 617 803 4823)  
21  
22 11 2. Roma Bhatia MD  
23  
24 12 General Internal Medicine Fellow, Beth Israel Deaconess Medical Centre, Harvard  
25  
26 13 Medical School  
27  
28 14 3. Nazlee Zebardast MD MSc FRCSC  
29  
30 15 Instructor of Ophthalmology, Glaucoma Specialist, Massachusetts Eye and Ear Infirmary  
31  
32  
33  
34  
35

36 18 **Word count**  
37

---

38 20 Abstract: 300 words  
39  
40 21 Article summary: 121 words  
41  
42 22 Manuscript: 2,205 words  
43  
44  
45  
46

47 25 **Key words**  
48

---

49 26  
50  
51 27 Marijuana, marijuana use, drug use, illicit, legalization  
52  
53  
54  
55  
56  
57  
58  
59  
60

## Abstract

---

**Objectives:** Understanding trends of marijuana use in the United States (US) throughout a period of particularly high adoption of marijuana-legalization, and understanding demographics most at risk of use, is important in evolving healthcare-policy and intervention. This study analyzes the demographic-specific changes in the prevalence of marijuana use in the US between 2005-2018.

**Design, Setting and Participants:** A fourteen-year retrospective cross-sectional analysis of the National Health and Nutrition Examination Survey (NHANES) database, a publicly-available biennially-collected national survey, weighted to represent the entire US population. A total of 35,212 adults between 18-69 years old participated in the seven-cycles of surveys analysed (2005-2018).

**Primary Outcome Measured:** Lifetime-use, first-use before 18-years-old, and past-year use of marijuana.

**Results:** The majority of adults reported ever using marijuana. While the overall prevalence of lifetime marijuana use remained stable ( $p=0.53$ ), past-year use increased significantly between 2005-2018 ( $p<0.001$ ) with highest rate of past-year use among younger age groups ( $p<0.001$ ), males ( $p<0.001$ ), and those with income below poverty level ( $p<0.001$ ). Past-year use was commonest among non-Hispanic blacks, and less common among Hispanic/Mexican populations ( $p<0.002$ ). Trends in past-year use increased among all age categories, males/females, all ethnicities, those with high-school education/above, and those at all income levels ( $p<0.01$  for all).

**Conclusions:** While lifetime marijuana-use remained stable, past-year use significantly increased between 2005-2018. While past-year use remained commonest in younger age groups, males, non-Hispanic blacks and those with lower income; increasing trends in past-year use were significant for all age, sex, race and income categories, and for those with high-school education/above. With high adoption of marijuana-legalization laws during this period, our results suggest an associated increase in past-year marijuana use.

An accurate understanding of those most at risk can help inform decisions of healthcare policy makers and professionals, and facilitate a safe transition of changing marijuana legalization and use in the US.

1  
2  
3 69 **Article Summary**  
4  
5 70

---

- 6 71 - This is the most recent study of trends of marijuana use in the United States, during a  
7 72 period of particularly high rates of adoption of marijuana legalization laws.  
8  
9 73 - The National Health and Nutrition Examination Survey (NHANES) database is a  
10 74 publicly-available and nation-wide database. The NHANES database is weighted  
11 75 (standardized), to accurately represent the entire population of the United States.  
12  
13 76 - The NHANES database is self-reported, and limited by reporter bias.  
14  
15 77 - Missing data was primarily from participants who were older and female, potentially  
16 78 underestimating the true prevalence of marijuana use among this demographic.  
17  
18 79 - State-based legalization information and use amongst adolescents less than 18-years-  
19 80 old was not available, and could not be accurately correlated with changing trends of  
20 81 marijuana use.  
21  
22  
23  
24  
25  
26  
27  
28  
29  
30  
31  
32  
33  
34  
35  
36  
37  
38  
39  
40  
41  
42  
43  
44  
45  
46  
47  
48  
49  
50  
51  
52  
53  
54  
55  
56  
57  
58  
59  
60

**Manuscript**

---

**Introduction:**

While remaining illegal at the federal level in the United States (US), marijuana is now legal for recreational use by adults over the age of 21 in 11 states, and for medical use in 33 states (1, 2). With particularly high adoption rates of medical marijuana legalization between 2007 and 2016 (3), and increasing social acceptability of marijuana use (4-6), describing trends in use among different demographics in the US is important in understanding which populations might be most affected by changing laws.

Prior studies have described increases in both marijuana use and misuse trends since medical marijuana legalisation (4, 7, 8) in marijuana users both domestically and overseas (9). However, some studies have shown no changes to trends of past-year use since legalisation (10, 11), and others have shown only increases in marijuana misuse (11). A recent analysis even described a significant decrease in marijuana misuse disorder since legalisation (12). There have also been inconsistent reports of the demographics of those most affected by changing medical and recreational marijuana legalisation; some studies describing increasing trends across all gender, age and ethnic demographics (7), some showing trend changes particularly for young, black, and Hispanic men (11), and others showing changes particularly among older individuals (4, 6, 13). Importantly, changing trends in medical and non-medical marijuana use do not appear to be restricted only to states with changing marijuana laws (14), despite being higher in states where laws have been passed (7). An understanding of both the social and the economic cost-effectiveness of legalising marijuana (15, 16), coupled with an understanding of trends of changing use, may be useful for those working in public health, public policy, and healthcare, responsible for policy intervention or caring for populations most affected by marijuana use.

The current paper uses data from the US National Health and Nutrition Examination Survey (NHANES), a nationally-representative sample of US adults, to examine the most recent 12-year trends in marijuana use in the United States. Additionally, we examine sociodemographic factors associated with marijuana use. We explore recent literature regarding the cost-effectiveness of medical and social marijuana legalization, adding to the current body of literature important for those in policy, or caring for those most affected.

**Methods:**

The National Health and Nutrition Examination Survey (NHANES) is an on-going biennial cross-sectional survey representing a non-institutionalized civilian US population, performed by the National Centre for Health Statistics (NCHS) and Centres for Disease Control and



1  
2  
3 124 Prevention (CDC). NHANES has been a continuous survey program providing health statistics  
4 125 for the US since 1999, examining a nationally-representative sample of about 5,000 people  
5 126 each year, located in counties across the US. Study teams consisting of multilingual physicians,  
6 127 medical and health technicians, and dietary health interviewers conduct interviews and  
7 128 perform examinations, and information collected is intended to be used to determine the  
8 129 prevalence of major diseases and risk factors for diseases, and for health promotion and  
9 130 disease prevention. The sample for the survey is selected to represent the US population of  
10 131 all ages. To produce reliable statistics, NHANES over-samples persons 60 and older, African  
11 132 Americans, and Hispanics (17).  
12 133

13 134 In the present study, seven two-year cycles of NHANES survey data between 2005-2018  
14 135 (inclusive) have been retrospectively analysed for baseline demographic information, and  
15 136 drug use questionnaire data. A total of 35,212 adults (US citizens) between 18-69 years old  
16 137 participated in the seven-cycles of surveys analysed. Of these, 32.9% had missing marijuana  
17 138 survey data. Those with missing data were significantly more likely to be older ( $p<0.001$ ),  
18 139 female ( $p<0.001$ ) and have less than high school education ( $p<0.001$ ). Missing data was  
19 140 handled by pairwise deletion to optimize data available for analysis. Participants undergo a  
20 141 home interview, and a comprehensive physical examination in a mobile examination centre  
21 142 (MEC). The 2005-2018 NHANES protocol was approved by the National Centre for Health  
22 143 Statistics research ethics review board and written informed consent obtained from all  
23 144 participants.  
24 145

25 146 Demographics data including age, gender, race/ethnicity, education and income were  
26 147 collected during the home interview. The drug use questionnaire was conducted in the mobile  
27 148 examination centre (MEC), and aimed to assess lifetime, past-year, and current usage of  
28 149 marijuana. Questions are self-administered using the Audio Computer-Assisted Self-Interview  
29 150 (ACASI) system. The ACASI was conducted in English, Spanish, Korean, Vietnamese, or Chinese  
30 151 (Mandarin and Cantonese). Participants reported lifetime use, age at first use and use within  
31 152 the past-year of marijuana.  
32 153

33 154 Given the NHANES complex probability sampling design, 2-year interview weights computed  
34 155 by the NCHS were used to calculate prevalence estimates and 95% confidence intervals  
35 156 (Taylor linearization), age-standardized to the 2000 US Census population as recommended  
36 157 by the NCHS. Differences in prevalence estimates were compared using chi-square tests.  
37 158 Univariate regression models were used to test for significant linear trends while  
38 159 multivariable regression models were used to determine characteristics associated with  
39 160 recent marijuana use. Results at the  $p<0.05$  level considered statistically significant. Statistical  
40 161 analysis was performed using STATA version 15.0 (StataCorp LP, College Station, TX).  
41 162

42 163 Patients or the public were not involved in the design, or conduct, or reporting, or  
43 164 dissemination plans of our research.

165

**Results:**

167

168 Overall, 53.5% (95% CI 52.8-54.1%) of the US adult population reported ever using marijuana  
169 between 2005-2018. The prevalence of lifetime marijuana use, and first use before the age  
170 of 18, remained stable between 2005 and 2018 ( $p=0.53$  and  $p=0.68$ , respectively) (Table 1).  
171 Overall 22.6% (95% CI 22.1-23.1%) of US adults reported using marijuana within the last year.  
172 The weighted prevalence of past-year marijuana use increased significantly during the study  
173 period from 19.1% (95% CI 15.3-23.7%) in 2005/06 to 29.1% (95% CI 26.0-32.5%) ( $p=0.001$ ) in  
174 2017/18.

175

176 The prevalence of past-year marijuana use was higher among younger age groups ( $p<0.001$ ),  
177 males ( $p<0.05$ ), and those with income below poverty level ( $p<0.05$ ) (Table 2). Past-year  
178 marijuana use was more common among non-Hispanic blacks, and less common among  
179 Hispanic/Mexicans ( $p<0.002$  (excluding 2011/12 and 2017/18)). Between 2005 - 2018 the  
180 prevalence of past-year marijuana use increased among all age categories ( $p<0.001$ ), males  
181 and females ( $p<0.001$ ), all racial categories ( $p<0.01$  for all groups), those with high school  
182 education or above ( $p<0.001$  for both) and those at all levels of income ( $p<0.01$ ).

183

184 Multivariate logistic regression analysis demonstrated higher odds of past-year marijuana use  
185 among younger age groups ( $p<0.001$ ), males ( $p<0.001$ ), non-Hispanic blacks ( $p<0.001$ ), and  
186 those with income below the poverty level ( $p<0.001$  for both) (Table 3). Past-year use was  
187 less likely among older individuals ( $p<0.001$ ), and Hispanic and Mexican Americans ( $p<0.001$ )  
188 and those with higher levels of education ( $p=0.003$ ) (Table 3).

189

190

**Discussion:**

192

193 The current study presents the most recent changes in marijuana use in the US during a period  
194 of particularly high legalization. It finds that while lifetime marijuana use, and first-use before  
195 the age of 18, has remained stable, the overall prevalence of past-year marijuana use has  
196 significantly increased over the 14-year period. While past-year use was still more common  
197 among younger age groups, males, non-Hispanic blacks and those with lower income,  
198 significant trends of increasing past-year use were seen in all age categories, males and  
199 females, all racial categories, highly-educated populations, and all income levels. Age-specific  
200 marijuana use trends in response to legalization laws has been studied elsewhere; but with  
201 inconsistent findings. There has been growing consensus that increasing recent-use of  
202 marijuana is seen among late to middle-aged adults after legalization (6, 13); a recent study  
203 by Salas-Wright and colleagues showing trends of increasing past-year use among late to  
204 middle-aged adults in the US between 2002-2014 (5), findings that are supported by the  
205 present study. Whether this pattern of recent-use among older populations is associated with

1  
2  
3 206 increasing marijuana-use for medicinal purposes (seen most prominently among older, white,  
4 207 male, and high-income populations in the US) (14), is unclear, and such data was not available  
5 208 for analysis in the present study. However, there has been less consensus about recent-use  
6 209 trends among adolescent populations. While a comprehensive study by Harpin and  
7 210 colleagues described no change in adolescent-use after legalization (10) (further supported  
8 211 by more recent findings (6)), a 2019 review by Bae and colleagues described increasing recent-  
9 212 use amongst adolescents in the US after legalization (8). Contrastingly, a 2016 US study by  
10 213 Grucza and colleagues describes that past-year marijuana use actually *decreased* among  
11 214 adolescents, during the highest periods of legalization (12). Information about marijuana-use  
12 215 trends in adolescents less than 18-years-old was not publicly available on NHANES for the  
13 216 present study, but it has been noted that over the 14-year study period, there has been no  
14 217 significant change in reported first-use before the age of 18 (table 1).  
15 218

16 219 Our findings of younger, male, non-Hispanic black and lower income populations being most  
17 220 likely to use marijuana overall, are also consistent with previous findings not aforementioned  
18 221 (4, 7). Native American populations, those living in urban areas, and those living in western  
19 222 states, have also been shown to be more likely to have recently used marijuana; but this  
20 223 information was not available on NHANES in sufficient detail, for the present analyses.  
21 224

22 225 In addition to demographic risk factors indicating potential marijuana use, an understanding  
23 226 of other risk factors is important for those involved in fields of public policy and healthcare.  
24 227 While age and gender remain somewhat inconsistently described risk factors, tobacco  
25 228 smoking is a demonstrated risk factor for marijuana use. Though not analyzed in the present  
26 229 study, a recent study demonstrated that current smokers have almost 6x increased odds of  
27 230 recent marijuana use compared to non-smokers (18), outlining another sub-population  
28 231 particularly at risk. Another group at risk of increasing marijuana use are non-medical users  
29 232 of prescription drugs (NMUPD). A recent study by Karjalainen and colleagues demonstrated  
30 233 significantly increasing trends of illicit drug use among NMUPD (92% of whom had used  
31 234 cannabis in the last year), that could not otherwise be explained by age or gender (19).  
32 235

33 236 Important to consider in the context of the present findings is that marijuana-use trends may  
34 237 not to be restricted only to states with marijuana legalization. In 2017, Hasin and colleagues  
35 238 demonstrated significantly increased marijuana use both in states with and without  
36 239 marijuana legalization laws (4, 7), albeit fractionally higher in states where marijuana was  
37 240 legalized. However, a recent analysis by Han and colleagues demonstrated a significantly  
38 241 higher trend of increasing medical-marijuana use in states without legalization (AOR 1.4, 95%  
39 242 CI 1.05-1.90), compared to states with legalization (AOR 1.3, 95% CI 1.03-1.61) (14);  
40 243 underlining the fact that evolving legalization laws are also of relevance to states where  
41 244 recreational and medical marijuana use remains illegal.  
42 245

1  
2  
3 246 Exploring the economic and societal cost-effectiveness of marijuana legalization is also  
4 247 important for those involved in healthcare policy and decision making. Marijuana legalization  
5 248 was posited to lower price, increase availability, and thereby increase marijuana use (6), with  
6 249 early fears that profit motive would take precedence over public health issues (20, 21). The  
7 250 retail price of marijuana on the legal cannabis market had sharply fallen by almost 70%, just  
8 251 three-years after legalization in Washington State (22, 23). Some reports described an initial  
9 252 increase in self-reported street prices of marijuana in response to legalization as demand  
10 253 increased, by up to 36% (24), with limited price change thereafter. However, similarly to  
11 254 results aforementioned, medical legalization appears to have affected only adult marijuana  
12 255 use, with minimal significant changes to adolescent use (13). While studies of the effect of  
13 256 recreational marijuana legalization on its use are still emerging, there appears to be  
14 257 no/minimal effect on adolescent or college marijuana use (13). The passage of legalization  
15 258 laws also offers an important social justice benefit (25); by removing mechanisms for unfair,  
16 259 damaging disparities in law enforcement (26). While more permissive marijuana laws may  
17 260 appeal to social justice aims (reducing racial disparity in law enforcement), and increase  
18 261 revenue to state and local government through taxation (6), the public health trade-offs and  
19 262 overall costs of use-related adverse physical and psychosocial consequences (27) in response  
20 263 to changing laws remains difficult to accurately describe (6).  
21  
22  
23  
24  
25  
26  
27  
28  
29

30 265 Strengths and Limitations: Strengths of our study include the size and heterogeneity of our  
31 266 population, the timespan, and the age-standardization of the NHANES data. Limitations to  
32 267 our study include reliance on self-reported data and reporter-bias, which may not have  
33 268 affected all demographics equally. Missing data was primarily from participants who were  
34 269 older and female, potentially underestimating the true prevalence of marijuana use among  
35 270 this demographic. Our dataset did not include youth aged 12-17 years old, a potentially at-  
36 271 risk population, nor include analysis of other risk factors associated with marijuana use (use  
37 272 of tobacco, or NMUPD). Certain ethnicity data (i.e. Native American identifiers) and  
38 273 geographical data (i.e. whether collected from states with or without legalization) were not  
39 274 available for analysis, nor was detail of marijuana use for medicinal or recreational purposes.  
40  
41  
42  
43  
44  
45  
46  
47  
48

#### 47 277 **Conclusion:**

48 278  
49 279 Our primary two findings describing characteristics of those most at risk of using marijuana,  
50 280 and those where trends of use have most significantly increased, adds to the current body of  
51 281 literature and understanding of marijuana trends in the United States. Given ongoing changes  
52 282 to marijuana legalization in the US, with the evolving public perception of marijuana safety  
53 283 and accessibility, an accurate understanding of which populations are most likely to be  
54 284 implicated, which additional predictive tools can identify those most at risk, and a balanced  
55 285 presentation of healthcare, social and economic costs of legalization, is warranted.  
56 286 Identification of these factors can help inform the decisions of healthcare policy makers and  
57  
58  
59  
60

1  
2  
3 287 professionals, and facilitate a safe transition of evolving marijuana legalization and use in the  
4 288 US.  
5  
6 289  
7 290  
8  
9  
10  
11  
12  
13  
14  
15  
16  
17  
18  
19  
20  
21  
22  
23  
24  
25  
26  
27  
28  
29  
30  
31  
32  
33  
34  
35  
36  
37  
38  
39  
40  
41  
42  
43  
44  
45  
46  
47  
48  
49  
50  
51  
52  
53  
54  
55  
56  
57  
58  
59  
60

For peer review only

1  
2  
3 292 **Author statements:**

4 293

6 294 There are no competing or conflicting interests to declare by any of the authors.

7 295

8 296

10 297 **Funding:**

11 298

13 299 This research received no specific grant from any funding agency in the public, commercial or  
14 300 not-for-profit sector.

15 301

16 302

18 303 **Author contributions:**

20 304

21 305 Dr William Mitchell: Analysis plan, data interpretation, manuscript composition and editing,  
22 306 submission, correspondence

23 307

25 308 Dr Roma Bhatia: Analysis plan, data interpretation, manuscript editing

26 309

28 310 Dr Nazlee Zebardast: Analysis plan, data extraction, analysis and interpretation, manuscript  
29 311 composition

30 312

31 313

34 314 **Data Statement:**

35 315

36 316 Data is fully accessible from the following website:

37 317 <https://wwwn.cdc.gov/nchs/nhanes/default.aspx>

38 318

39 319

40

41

42

43

44

45

46

47

48

49

50

51

52

53

54

55

56

57

58

59

60

1  
2  
3 320 **References**  
4  
5 321

---

- 6 322 1. Cohn A, Johnson A, Rose S, Rath J, Villanti A. Support for Marijuana Legalization and  
7 323 Predictors of Intentions to Use Marijuana More Often in Response to Legalization Among  
8 324 U.S. Young Adults. *Substance Use and Misuse*. 2017;52(2):203-13.
- 9 325 2. Berke J, Gould S. Legal marijuana just went on sale in Illinois. Here are all the states  
10 326 where cannabis is legal *Business Insider: Business Insider*; 2020 [Available from:  
11 327 <https://www.businessinsider.com/legal-marijuana-states-2018-1>.  
12 328 3. State Medical Marijuana Laws: NCSL; 2019 [Available from:  
13 329 <http://www.ncsl.org/research/health/state-medical-marijuana-laws.aspx>.
- 14 330 4. Hasin D, Saha T, Kerridge B, Goldstein R, Chou P, Zhang H, et al. Prevalence of  
15 331 Marijuana Use Disorders in the United States Between 2001–2002 and 2012–2013. *JAMA*  
16 332 *Psychiatry*. 2015;72(12):1235-42.
- 17 333 5. Salas-Wright C, Vaughn M, Cummings-Vaughn L, Holzer K, Nelson E, AbiNader M, et  
18 334 al. Trends and correlates of marijuana use among late middle-aged and older adults in the  
19 335 United States, 2002–2014. *Drug and Alcohol Dependence*. 2017;1(171):97-106.
- 20 336 6. Carliner H, Brown Q, Sarvet A, Hasin D. Cannabis use, attitudes, and legal status in  
21 337 the U.S.: A review. *Preventative Medicine*. 2017;104:13-23.
- 22 338 7. Hasin D, Sarvet A, Cerdá M, Keyes K, Stohl M, Galea S, et al. US Adult Illicit Cannabis  
23 339 Use, Cannabis Use Disorder, and Medical Marijuana Laws: 1991-1992 to 2012-2013. *JAMA*  
24 340 *Psychiatry*. 2017;74(6):579-88.
- 25 341 8. Bae H, Kerr D. Marijuana use trends among college students in states with and  
26 342 without legalization of recreational use: initial and longer-term changes from 2008 to 2018.  
27 343 *Addiction*. 2019.
- 28 344 9. Karjalainen K, Savonen J, Hakkarainen P. Drug Use and Drug Attitudes Among Finns -  
29 345 Drug Related Population Surveys in Finland 1992-2014. Helsinki, Finland: National Institute  
30 346 for Health and Welfare; 2016.
- 31 347 10. Harpin S, Brooks-Russell A, Ma M, James K, Levinson A. Adolescent Marijuana Use  
32 348 and Perceived Ease of Access Before and After Recreational Marijuana Implementation in  
33 349 Colorado. *Substance Use and Misuse*. 2017;53(3):451-6.
- 34 350 11. Compton W, Grant B, Colliver J, Glantz M, Stinson F. Prevalence of Marijuana Use  
35 351 Disorders in the United States 1992-1992 and 2001-2002. *JAMA Network*. 2004;291:2114-  
36 352 21.
- 37 353 12. Grucza R, Agrawal A, Krauss M, Bongu J, Plunk A, Cavazos-Rehg P, et al. Declining  
38 354 Prevalence of Marijuana Use Disorders Among Adolescents in the United States, 2002–  
39 355 2013. *J Am Acad Child Adolesc Psychiatry*. 2016;55(6).
- 40 356 13. Smart R, Pacula R. Early evidence of the impact of cannabis legalization on cannabis  
41 357 use, cannabis use disorder, and the use of other substances: Findings from state policy  
42 358 evaluations. *American Journal of Drug and Alcohol Abuse*. 2019;45(6):644-63.
- 43 359 14. Han B, Compton W, Blanco C, Jones C. Trends in and correlates of medical marijuana  
44 360 use among adults in the  
45 361 United States. *Drug and Alcohol Dependence*. 2018;186:120-9.
- 46 362 15. Shanahan M, Ritter A. Cost Benefit Analysis of Two Policy Options for Cannabis:  
47 363 Status Quo and Legalisation. *PLoS ONE*. 2014;9(4):e95569.
- 48 364 16. Tyree G, Sarkar R, Bellows B, Ellis R, Atkinson J, Marcotte T, et al. A Cost-  
49 365 Effectiveness Model for Adjunctive Smoked Cannabis in the Treatment of Chronic  
50 366 Neuropathic Pain. *Cannabis and Cannabinoid Research*. 2019;4(1):62-72.

- 1  
2  
3 367 17. National Health and Nutrition Examination Survey National Center for Health  
4 368 Statistics: Centers for Disease Control and Prevention; 2017 [Available from:  
5 369 [https://www.cdc.gov/nchs/nhanes/about\\_nhanes.htm](https://www.cdc.gov/nchs/nhanes/about_nhanes.htm).  
6 370  
7 370 18. Moeller S, Fink D, Gbedemah M, Hasin D, Galea S, Zvolensky M, et al. Trends in illicit  
8 371 drug use among smokers and non-smokers in the United States, 2002–2014. *Journal of*  
9 372 *Clinical Psychiatry*. 2018;79(3).  
10 373  
11 373 19. Karjalainen K, Lintonen T, Hakkarainen P. Illicit drug use is increasing among non-  
12 374 medical users of prescription drugs—Results from population-based surveys 2002–2014.  
13 375 *Drug and Alcohol Dependence*. 2017;178:430-4.  
14 376  
15 376 20. Pacula R, Kilmer B, Wagenaar A, Chaloupka F, Caulkins J. Developing public health  
16 377 regulations for marijuana: lessons from alcohol and tobacco. *American Journal of Public*  
17 378 *Health*. 2014;104:1021-8.  
18 379  
19 379 21. Room R. Legalizing a market for cannabis for pleasure: Colorado, Washington,  
20 380 Uruguay and beyond. *Addiction*. 2014;109:345-51.  
21 381  
22 381 22. Humphreys K. How legalization caused the price of marijuana to collapse  
23 382 *Washington Post: Washington post*; 2017 [Available from:  
24 383 [https://www.washingtonpost.com/news/wonk/wp/2017/09/05/how-legalization-caused-](https://www.washingtonpost.com/news/wonk/wp/2017/09/05/how-legalization-caused-the-price-of-marijuana-to-collapse/)  
25 384 [the-price-of-marijuana-to-collapse/](https://www.washingtonpost.com/news/wonk/wp/2017/09/05/how-legalization-caused-the-price-of-marijuana-to-collapse/).  
26 385  
27 385 23. Smart R, Caulkins J, Kilmer B, Davenport S, Midgette G. VARIATION IN CANNABIS  
28 386 POTENCY & PRICES IN A NEWLY-LEGAL MARKET: Evidence from 30 million cannabis sales in  
29 387 Washington State. *Addiction*. 2017;112(12):2167-77.  
30 388  
31 388 24. Hunt P, Pacula R. Early Impacts of Marijuana Legalization: An Evaluation of Prices in  
32 389 Colorado and Washington. *Journal of Primary Prevention*. 2017;38(3):221-48.  
33 390  
34 390 25. Jensen E, Roussell A. Field observations of the developing legal recreational cannabis  
35 391 economy in Washington State. *International Journal of Drug Policy*. 2016;33:96-101.  
36 392  
37 392 26. Golub A, Johnson B, Dunlap E. The race/ethnicity disparity in misdemeanor  
38 393 marijuana arrests in New York City. *Criminology and Public Policy*. 2007;6:131-64.  
39 394  
40 394 27. Hall W. Alcohol and cannabis: comparing their adverse health effects and regulatory  
41 395 regimes. *International Journal of Drug Policy*. 2017;42:57-62.  
42 396  
43  
44  
45  
46  
47  
48  
49  
50  
51  
52  
53  
54  
55  
56  
57  
58  
59  
60



Table 1: Prevalence of marijuana use in adults in the United States, NHANES 2005-2018

|                                 | 2005-2006 |                       | 2007-2008 |                       | 2009-2010 |                       | 2011-2012 |                       | 2013-2014 |                       | 2015-2016 |                       | 2017-2018 |                       | P     |
|---------------------------------|-----------|-----------------------|-----------|-----------------------|-----------|-----------------------|-----------|-----------------------|-----------|-----------------------|-----------|-----------------------|-----------|-----------------------|-------|
|                                 | Total N   | Prevalence % (95% CI) |       |
| <b>Lifetime use</b>             | 2922      | 61.5<br>(57.2-65.7)   | 3255      | 60.5<br>(57.2-63.7)   | 3739      | 57.2<br>(53.0-61.3)   | 3333      | 59.9<br>(56.0-63.6)   | 3690      | 59.2<br>(55.6-62.7)   | 3422      | 57.3<br>(53.1-61.5)   | 3199      | 60.9<br>(57.9-63.7)   | 0.53  |
| <b>Age &lt;18 at First used</b> | 1617      | 59.6<br>(56.7-62.7)   | 1799      | 60.7<br>(58.0-63.5)   | 1937      | 62.7<br>(59.0-66.4)   | 1770      | 60.1<br>(56.0-64.0)   | 1984      | 61.4<br>(58.8-63.9)   | 1715      | 60.1<br>(56.5-63.7)   | 1737      | 61.8<br>(57.1-66.3)   | 0.68  |
| <b>Past-year use</b>            | 2922      | 19.1<br>(15.3-23.7)   | 3255      | 19.1<br>(17.5-20.7)   | 3739      | 20.6<br>(18.2-23.3)   | 3333      | 22.4<br>(19.8 - 25.2) | 3690      | 22.3<br>(19.9-24.8)   | 3422      | 24.9<br>(20.0-30.6)   | 3199      | 29.1<br>(26.0-32.5)   | 0.001 |

*Key:*

N denotes unweighted total number of participants in each category

Prevalence percentage with 95% (CI), computed using 2-year MEC weights to provide estimates for the total US population, and age-standardized to 2000 Census population.

P values test overall trend in prevalence estimates in each category

NHANES = National Health and Nutrition Examination Survey

Table 2: Prevalence of self-reported past-year marijuana use in adults in the United States, by selected demographic factors, NHANES 2005-2018

|                    | 2005-2006                               | 2007-2008                   | 2009-2010                   | 2011-2012                   | 2013-2014                   | 2015-2016                   | 2017-2018                   | P value              |
|--------------------|-----------------------------------------|-----------------------------|-----------------------------|-----------------------------|-----------------------------|-----------------------------|-----------------------------|----------------------|
|                    | Prevalence %<br>(95% CI)                | Prevalence %<br>(95% CI)    | Prevalence %<br>(95% CI)    | Prevalence %<br>(95% CI)    | Prevalence %<br>(95% CI)    | Prevalence %<br>(95% CI)    | Prevalence %<br>(95% CI)    |                      |
| <b>Age</b>         |                                         |                             |                             |                             |                             |                             |                             |                      |
| - 18-29            | 34.0 <sup>a</sup> (26.7-42.0)           | 35.1 (30.0-40.6)            | 34.4 (30.7-38.3)            | 36.2 (31.7-41.1)            | 38.1 (35.1-41.2)            | 37.3 (30.4-44.8)            | 46.3 (42.5-50.2)            | P=0.001 <sup>c</sup> |
| - 30-49            | 16.1 (12.3-20.7)                        | 16.2 (14.3-18.2)            | 17.5 (14.7-20.7)            | 17.0 (14.4-20.1)            | 16.3 (13.8-19.1)            | 21.1 (16.0-27.3)            | 24.6 (20.6-29.1)            | P=0.001              |
| - 50-69            | 10.5 (7.4-14.6)<br>P<0.001 <sup>b</sup> | 8.1 (6.0-10.9)<br>P<0.001   | 10.3 (7.8-13.4)<br>P<0.001  | 15.5 (11.4-20.8)<br>P<0.001 | 14.3 (9.2-21.5)<br>P<0.001  | 18.0 (13.0-23.7)<br>P<0.001 | 17.0 (12.4-22.8)<br>P<0.001 | P<0.001              |
| <b>Gender</b>      |                                         |                             |                             |                             |                             |                             |                             |                      |
| - Male             | 24.8 (20.3-29.9)                        | 23.1 (20.8-25.7)            | 24.8 (22.0-27.8)            | 27.3 (24.6-30.1)            | 26.3 (23.2-29.7)            | 29.2 (23.1-36.3)            | 32.0 (28.6-35.6)            | P=0.001              |
| - Female           | 13.6 (10.1-18.1)<br>P<0.001             | 15.1 (13.1-17.3)<br>P<0.001 | 16.3 (13.6-19.3)<br>P<0.001 | 17.3 (14.0-21.2)<br>P<0.001 | 18.2 (15.3-21.6)<br>P=0.001 | 20.6 (16.5-25.4)<br>P<0.001 | 26.3 (22.1-31.0)<br>P=0.02  | P<0.001              |
| <b>Race</b>        |                                         |                             |                             |                             |                             |                             |                             |                      |
| - NH White         | 20.1 (15.6-25.7)                        | 19.4 (17.7-21.3)            | 21.1 (18.4-24.1)            | 22.7 (19.4-26.3)            | 22.0 (18.3-26.3)            | 26.7 (20.4-34.1)            | 30.0 (25.5-34.5)            | P<0.001              |
| - NH Black         | 23.56 (18.4-29.1)                       | 26.9 (22.6-31.7)            | 27.6 (24.6-30.9)            | 27.3 (22.1-33.2)            | 32.9 (29.8-36.1)            | 32.5 (28.8-36.5)            | 36.8 (32.5-41.3)            | P<0.001              |
| - Hispanic/Mexican | 11.7 (8.3-16.2)                         | 13.6 (9.8-18.5)             | 16.6 (13.0-20.9)            | 18.9 (15.2-23.2)            | 17.9 (15.5-20.6)            | 16.3 (13.1-20.2)            | 25.0 (22.2-28.1)            | P<0.001              |
| - Other            | 13.2(7.9-21.2)<br>P=0.003               | 13.3 (7.5-22.6)<br>P=0.002  | 12.7 (7.4-21.1)<br>P<0.001  | 18.7 (14.2-24.1)<br>P=0.06  | 18.0 (13.7-23.3)<br>P<0.001 | 19.9 (13.3-28.7)<br>P=0.001 | 22.9 (18.3-28.3)<br>P=0.002 | P=0.003              |
| <b>Education</b>   |                                         |                             |                             |                             |                             |                             |                             |                      |
| - <High School     | 22.5 (16.5-30.0)                        | 22.1 (17.6-27.3)            | 23.3 (19.5-27.6)            | 27.5 (22.6-33.0)            | 27.9 (23.6-32.6)            | 24.7 (20.0-30.1)            | 27.8 (23.3-32.8)            | P=0.06               |
| - High School      | 21.6 (15.1-30.0)                        | 19.6 (17.5-21.8)            | 24.7 (21.2-28.5)            | 25.8 (20.8-31.5)            | 25.4 (21.1-30.3)            | 27.5 (22.3-33.4)            | 34.1 (28.1-40.6)            | P<0.001              |
| - >High School     | 17.4 (13.2-22.7)<br>P=0.25              | 18.0 (15.4-20.8)<br>P=0.21  | 18.2 (15.1-21.9)<br>P=0.006 | 20.2 (17.2-23.4)<br>P=0.01  | 19.8 (16.9-23.0)<br>P=0.01  | 24.1 (18.2-31.3)<br>P=0.42  | 27.1 (23.4-31.2)<br>P=0.05  | P<0.001              |
| <b>Poverty</b>     |                                         |                             |                             |                             |                             |                             |                             |                      |
| - >2x PL           | 17.7 (13.5-22.8)                        | 16.3 (14.4-18.5)            | 17.1 (14.2-20.5)            | 18.3 (15.6-21.3)            | 18.5 (15.7-21.6)            | 22.4 (17.3-28.4)            | 26.3 (22.2-30.8)            | P=0.001              |
| - 1-2X PL          | 22.0 (16.4-28.8)                        | 24.5 (20.8-28.6)            | 22.4 (18.0-27.7)            | 27.9 (23.8-32.3)            | 25.3 (21.6-29.5)            | 29.4 (21.8-38.4)            | 32.1 (28.3-36.2)            | P=0.002              |
| - < PL             | 24.3 (19.2-30.2)<br>P=0.05              | 25.2 (19.5-32.0)<br>P=0.001 | 34.6 (30.9-38.6)<br>P<0.001 | 31.1 (27.1-35.4)<br>P<0.001 | 33.2 (28.3-38.6)<br>P<0.001 | 29.8 (23.6-37.0)<br>P=0.004 | 37.0 (32.2-42.1)<br>P=0.001 | P=0.002              |

Key:  
Prevalence percentage with 95% confidence intervals (CI), computed using 2-year interview weights to provide estimates for the total US population and are age-standardized to the US 2000 Census population.

<sup>a</sup> percentage interpretation: of those aged 18-29, 34% reported marijuana use within the past 12 months. Poverty defined using poverty income ratio, accounting for family size

<sup>b</sup> P values test global within group differences in prevalence

<sup>c</sup> P values test overall trend in prevalence estimates in each category

NH = Non-Hispanic

PL = Poverty Level

NHANES = National Health and Nutrition Examination Survey

Table 3: Adjusted odds of past-year marijuana use in adults in the United States, NHANES 2005-2018

| Demographic variable       | Past-year marijuana use<br>OR (95% CI) | P value |
|----------------------------|----------------------------------------|---------|
| <b>Age of participants</b> |                                        |         |
| - 18-29                    | 1.0 (reference)                        |         |
| - 30-49                    | 0.39 (0.36-0.43)                       | P<0.001 |
| - 50-69                    | 0.26 (0.22-0.30)                       | P<0.001 |
| <b>Gender</b>              |                                        |         |
| - Female                   | 1.0 (reference)                        |         |
| - Male                     | 1.67 (1.55-1.81)                       | P<0.001 |
| <b>Race</b>                |                                        |         |
| - Non-Hispanic White       | 1.0 (reference)                        |         |
| - Non-Hispanic Black       | 1.23 (1.09-1.39)                       | P=0.001 |
| - Hispanic/Mexican         | 0.51 (0.44-0.58)                       | P<0.001 |
| - Other                    | 0.63 (0.54-0.73)                       | P<0.001 |
| <b>Education</b>           |                                        |         |
| - < High School            | 1.0 (reference)                        |         |
| - High School              | 0.95 (0.81-1.12)                       | P=0.58  |
| - > High School            | 0.82 (0.73-0.93)                       | P=0.003 |
| <b>Poverty</b>             |                                        |         |
| - >2x Poverty Level        | 1.0 (reference)                        |         |
| - 1-2X Poverty Level       | 1.41 (1.24-1.59)                       | P<0.001 |
| - < Poverty Level          | 1.69 (1.49-1.92)                       | P<0.001 |
| <b>Year of survey</b>      | 1.10 (1.05-1.14)                       | P<0.001 |

*Key:*

Odds ratio (OR) with 95% confidence intervals (CI) computed using 12-year interview weights to provide estimates for the total US population and are age-standardized to the US 2000 Census population.

Poverty defined using poverty income ratio, which accounts for family size

Year covariate modelled as a continuous variable

NHANES = National Health and Nutrition Examination Survey

1  
2  
3  
4  
5  
6  
7  
8  
9  
10  
11  
12  
13  
14  
15  
16  
17  
18  
19  
20  
21  
22  
23  
24  
25  
26  
27  
28  
29  
30  
31  
32  
33  
34  
35  
36  
37  
38  
39  
40  
41  
42  
43  
44  
45  
46

For peer review only

STROBE Statement—Checklist of items that should be included in reports of *cross-sectional studies*

|                              | Item | Recommendation                                                                                                                                                                                               | Page |
|------------------------------|------|--------------------------------------------------------------------------------------------------------------------------------------------------------------------------------------------------------------|------|
| <b>Title and abstract</b>    | 1    | (a) Indicate the study's design with a commonly used term in the title or the abstract                                                                                                                       | 1    |
|                              |      | (b) Provide in the abstract an informative and balanced summary of what was done and what was found                                                                                                          | 2    |
| <b>Introduction</b>          |      |                                                                                                                                                                                                              |      |
| Background/rationale         | 2    | Explain the scientific background and rationale for the investigation being reported                                                                                                                         | 4    |
| Objectives                   | 3    | State specific objectives, including any prespecified hypotheses                                                                                                                                             | 4    |
| <b>Methods</b>               |      |                                                                                                                                                                                                              |      |
| Study design                 | 4    | Present key elements of study design early in the paper                                                                                                                                                      | 5    |
| Setting                      | 5    | Describe the setting, locations, and relevant dates, including periods of recruitment, exposure, follow-up, and data collection                                                                              | 5    |
| Participants                 | 6    | (a) Give the eligibility criteria, and the sources and methods of selection of participants                                                                                                                  | 5    |
| Variables                    | 7    | Clearly define all outcomes, exposures, predictors, potential confounders, and effect modifiers. Give diagnostic criteria, if applicable                                                                     | 5    |
| Data sources/<br>measurement | 8*   | For each variable of interest, give sources of data and details of methods of assessment (measurement). Describe comparability of assessment methods if there is more than one group                         | 5    |
| Bias                         | 9    | Describe any efforts to address potential sources of bias                                                                                                                                                    | 5    |
| Study size                   | 10   | Explain how the study size was arrived at                                                                                                                                                                    | 5    |
| Quantitative variables       | 11   | Explain how quantitative variables were handled in the analyses. If applicable, describe which groupings were chosen and why                                                                                 | 5    |
| Statistical methods          | 12   | (a) Describe all statistical methods, including those used to control for confounding                                                                                                                        | 5    |
|                              |      | (b) Describe any methods used to examine subgroups and interactions                                                                                                                                          | 5    |
|                              |      | (c) Explain how missing data were addressed                                                                                                                                                                  | 5    |
|                              |      | (d) If applicable, describe analytical methods taking account of sampling strategy                                                                                                                           | 5    |
|                              |      | (e) Describe any sensitivity analyses                                                                                                                                                                        | -    |
| <b>Results</b>               |      |                                                                                                                                                                                                              |      |
| Participants                 | 13*  | (a) Report numbers of individuals at each stage of study—eg numbers potentially eligible, examined for eligibility, confirmed eligible, included in the study, completing follow-up, and analysed            | 5, 6 |
|                              |      | (b) Give reasons for non-participation at each stage                                                                                                                                                         | -    |
|                              |      | (c) Consider use of a flow diagram                                                                                                                                                                           | -    |
| Descriptive data             | 14*  | (a) Give characteristics of study participants (eg demographic, clinical, social) and information on exposures and potential confounders                                                                     | 6    |
|                              |      | (b) Indicate number of participants with missing data for each variable of interest                                                                                                                          | 5    |
| Outcome data                 | 15*  | Report numbers of outcome events or summary measures                                                                                                                                                         | 6    |
| Main results                 | 16   | (a) Give unadjusted estimates and, if applicable, confounder-adjusted estimates and their precision (eg, 95% confidence interval). Make clear which confounders were adjusted for and why they were included | 6    |

|                          |    |                                                                                                                                                                            |      |
|--------------------------|----|----------------------------------------------------------------------------------------------------------------------------------------------------------------------------|------|
|                          |    | (b) Report category boundaries when continuous variables were categorized                                                                                                  | 6    |
|                          |    | (c) If relevant, consider translating estimates of relative risk into absolute risk for a meaningful time period                                                           | -    |
| Other analyses           | 17 | Report other analyses done—eg analyses of subgroups and interactions, and sensitivity analyses                                                                             | 6    |
| <b>Discussion</b>        |    |                                                                                                                                                                            |      |
| Key results              | 18 | Summarise key results with reference to study objectives                                                                                                                   | 6, 7 |
| Limitations              | 19 | Discuss limitations of the study, taking into account sources of potential bias or imprecision. Discuss both direction and magnitude of any potential bias                 | 8    |
| Interpretation           | 20 | Give a cautious overall interpretation of results considering objectives, limitations, multiplicity of analyses, results from similar studies, and other relevant evidence | 8    |
| Generalisability         | 21 | Discuss the generalisability (external validity) of the study results                                                                                                      | 8    |
| <b>Other information</b> |    |                                                                                                                                                                            |      |
| Funding                  | 22 | Give the source of funding and the role of the funders for the present study and, if applicable, for the original study on which the present article is based              | 10   |

\*Give information separately for exposed and unexposed groups.

**Note:** An Explanation and Elaboration article discusses each checklist item and gives methodological background and published examples of transparent reporting. The STROBE checklist is best used in conjunction with this article (freely available on the Web sites of PLoS Medicine at <http://www.plosmedicine.org/>, Annals of Internal Medicine at <http://www.annals.org/>, and Epidemiology at <http://www.epidem.com/>). Information on the STROBE Initiative is available at [www.strobe-statement.org](http://www.strobe-statement.org).

# BMJ Open

## A Retrospective Cross-Sectional Analysis of the Changes in Marijuana Use in the United States, 2005-2018

|                                 |                                                                                                                                                                                                                |
|---------------------------------|----------------------------------------------------------------------------------------------------------------------------------------------------------------------------------------------------------------|
| Journal:                        | <i>BMJ Open</i>                                                                                                                                                                                                |
| Manuscript ID                   | bmjopen-2020-037905.R2                                                                                                                                                                                         |
| Article Type:                   | Original research                                                                                                                                                                                              |
| Date Submitted by the Author:   | 19-Jun-2020                                                                                                                                                                                                    |
| Complete List of Authors:       | Mitchell, William; Harvard University, Harvard School of Public Health<br>Bhatia, Roma; Beth Israel Deaconess Medical Center<br>Zebardast, Nazlee; Massachusetts Eye and Ear Infirmary; Harvard Medical School |
| <b>Primary Subject Heading</b>: | Public health                                                                                                                                                                                                  |
| Secondary Subject Heading:      | Public health                                                                                                                                                                                                  |
| Keywords:                       | PUBLIC HEALTH, Substance misuse < PSYCHIATRY, Health policy < HEALTH SERVICES ADMINISTRATION & MANAGEMENT                                                                                                      |
|                                 |                                                                                                                                                                                                                |

SCHOLARONE™  
Manuscripts



I, the Submitting Author has the right to grant and does grant on behalf of all authors of the Work (as defined in the below author licence), an exclusive licence and/or a non-exclusive licence for contributions from authors who are: i) UK Crown employees; ii) where BMJ has agreed a CC-BY licence shall apply, and/or iii) in accordance with the terms applicable for US Federal Government officers or employees acting as part of their official duties; on a worldwide, perpetual, irrevocable, royalty-free basis to BMJ Publishing Group Ltd ("BMJ") its licensees and where the relevant Journal is co-owned by BMJ to the co-owners of the Journal, to publish the Work in this journal and any other BMJ products and to exploit all rights, as set out in our [licence](#).

The Submitting Author accepts and understands that any supply made under these terms is made by BMJ to the Submitting Author unless you are acting as an employee on behalf of your employer or a postgraduate student of an affiliated institution which is paying any applicable article publishing charge ("APC") for Open Access articles. Where the Submitting Author wishes to make the Work available on an Open Access basis (and intends to pay the relevant APC), the terms of reuse of such Open Access shall be governed by a Creative Commons licence – details of these licences and which [Creative Commons](#) licence will apply to this Work are set out in our licence referred to above.

Other than as permitted in any relevant BMJ Author's Self Archiving Policies, I confirm this Work has not been accepted for publication elsewhere, is not being considered for publication elsewhere and does not duplicate material already published. I confirm all authors consent to publication of this Work and authorise the granting of this licence.



1  
2  
3 1 **Title**  
4  
5  
6

---

7 3 **A Retrospective Cross-Sectional Analysis of the Changes in Marijuana Use in the United States, 2005-**  
8 **2018**  
9

10 5  
11  
12 6 **Author Details**  
13

---

- 14 7  
15  
16 8 1. William Mitchell MBBS MPH GDipClinEd  
17  
18 9 Master of Public Health student, Harvard T.H. Chan School of Public Health  
19  
20 10 Corresponding author: (email: william.greig.mitchell@gmail.com; mobile: 617 803 4823)  
21  
22 11 2. Roma Bhatia MD  
23  
24 12 General Internal Medicine Fellow, Beth Israel Deaconess Medical Centre, Harvard  
25  
26 13 Medical School  
27  
28 14 3. Nazlee Zebardast MD MSc FRCSC  
29  
30 15 Instructor of Ophthalmology, Glaucoma Specialist, Massachusetts Eye and Ear Infirmary  
31  
32 16  
33 17

34 18 **Word count**  
35

---

36 19  
37  
38 20 Abstract: 300 words  
39  
40 21 Article summary: 121 words  
41  
42 22 Manuscript: 2,220 words  
43  
44 23  
45  
46 24

47 25 **Key words**  
48

---

49 26  
50  
51 27 Marijuana, marijuana use, drug use, illicit, legalization  
52  
53 28  
54  
55  
56  
57  
58  
59  
60

## Abstract

---

**Objectives:** Understanding trends of marijuana use in the United States (US) throughout a period of particularly high adoption of marijuana-legalization, and understanding demographics most at risk of use, is important in evolving healthcare-policy and intervention. This study analyzes the demographic-specific changes in the prevalence of marijuana use in the US between 2005-2018.

**Design, Setting and Participants:** A fourteen-year retrospective cross-sectional analysis of the National Health and Nutrition Examination Survey (NHANES) database, a publicly-available biennially-collected national survey, weighted to represent the entire US population. A total of 35,212 adults between 18-69 years old participated in the seven-cycles of surveys analysed (2005-2018).

**Primary Outcome Measured:** Lifetime-use, first-use before 18-years-old, and past-year use of marijuana.

**Results:** The majority of adults reported ever using marijuana. While the overall prevalence of lifetime marijuana use remained stable ( $p=0.53$ ), past-year use increased significantly between 2005-2018 ( $p<0.001$ ) with highest rate of past-year use among younger age groups ( $p<0.001$ ), males ( $p<0.001$ ), and those with income below poverty level ( $p<0.001$ ). Past-year use was commonest among non-Hispanic blacks, and less common among Hispanic/Mexican populations ( $p<0.002$ ). Trends in past-year use increased among all age categories, males/females, all ethnicities, those with high-school education/above, and those at all income levels ( $p<0.01$  for all).

**Conclusions:** While lifetime marijuana-use remained stable, past-year use significantly increased between 2005-2018. While past-year use remained commonest in younger age groups, males, non-Hispanic blacks and those with lower income; increasing trends in past-year use were significant for all age, sex, race and income categories, and for those with high-school education/above. With high adoption of marijuana-legalization laws during this period, our results suggest an associated increase in past-year marijuana use.

An accurate understanding of those most at risk can help inform decisions of healthcare policy makers and professionals, and facilitate a safe transition of changing marijuana legalization and use in the US.

1  
2  
3 69 **Article Summary**  
4  
5 70

---

- 6 71 - This is the most recent study of trends of marijuana use in the United States, during a  
7 72 period of particularly high rates of adoption of marijuana legalization laws.  
8  
9 73 - The National Health and Nutrition Examination Survey (NHANES) database is a  
10 74 publicly-available and nation-wide database. The NHANES database is weighted  
11 75 (standardized), to accurately represent the entire population of the United States.  
12  
13 76 - The NHANES database is self-reported, and limited by reporter bias.  
14  
15 77 - Missing data was primarily from participants who were older and female, potentially  
16 78 underestimating the true prevalence of marijuana use among this demographic.  
17  
18 79 - State-based legalization information and use amongst adolescents less than 18-years-  
19 80 old was not available, and could not be accurately correlated with changing trends of  
20 81 marijuana use.  
21  
22  
23  
24  
25  
26  
27  
28  
29  
30  
31  
32  
33  
34  
35  
36  
37  
38  
39  
40  
41  
42  
43  
44  
45  
46  
47  
48  
49  
50  
51  
52  
53  
54  
55  
56  
57  
58  
59  
60

## 83 Manuscript

---

84

### 85 Introduction:

86

87 While remaining illegal at the federal level in the United States (US), marijuana is now legal  
88 for recreational use by adults over the age of 21 in 11 states, and for medical use in 33 states  
89 (1, 2). With particularly high adoption rates of medical marijuana legalization between 2007  
90 and 2016 (3), and increasing social acceptability of marijuana use (4-6), describing trends in  
91 use among different demographics in the US is important in understanding which populations  
92 might be most affected by changing laws.

93

94 Prior studies have described increases in both marijuana use and misuse trends since medical  
95 marijuana legalisation (4, 7, 8) in marijuana users both domestically and overseas (9).  
96 However, some studies have shown no changes to trends of past-year use since legalisation  
97 (10, 11), and others have shown only increases in marijuana misuse (11). A recent analysis  
98 even described a significant decrease in marijuana misuse disorder since legalisation (12).  
99 There have also been inconsistent reports of the demographics of those most affected by  
100 changing medical and recreational marijuana legalisation; some studies describing increasing  
101 trends across all gender, age and ethnic demographics (7), some showing trend changes  
102 particularly for young, black, and Hispanic men (11), and others showing changes particularly  
103 among older individuals (4, 6, 13). Importantly, changing trends in medical and non-medical  
104 marijuana use do not appear to be restricted only to states with changing marijuana laws (14),  
105 despite being higher in states where laws have been passed (7). An understanding of both the  
106 social and the economic cost-effectiveness of legalising marijuana (15, 16), coupled with an  
107 understanding of trends of changing use, may be useful for those working in public health,  
108 public policy, and healthcare, responsible for policy intervention or caring for populations  
109 most affected by marijuana use.

110

111 The current paper uses data from the US National Health and Nutrition Examination Survey  
112 (NHANES), a nationally-representative sample of US adults, to examine the most recent 12-  
113 year trends in marijuana use in the United States. Additionally, we examine sociodemographic  
114 factors associated with marijuana use. We explore recent literature regarding the cost-  
115 effectiveness of medical and social marijuana legalization, adding to the current body of  
116 literature important for those in policy, or caring for those most affected.

117

118

### 119 Methods:

120

121 The National Health and Nutrition Examination Survey (NHANES) is an on-going biennial  
122 cross-sectional survey representing a non-institutionalized civilian US population, performed  
123 by the National Centre for Health Statistics (NCHS) and Centres for Disease Control and

1  
2  
3 124 Prevention (CDC). NHANES has been a continuous survey program providing health statistics  
4 125 for the US since 1999, examining a nationally-representative sample of about 5,000 people  
5 126 each year, located in counties across the US. Study teams consisting of multilingual physicians,  
6 127 medical and health technicians, and dietary health interviewers conduct interviews and  
7 128 perform examinations, and information collected is intended to be used to determine the  
8 129 prevalence of major diseases and risk factors for diseases, and for health promotion and  
9 130 disease prevention; making NHANES an ideal data source to describe marijuana use trends in  
10 131 a nationally-representative population. The sample for the survey is selected to represent the  
11 132 US population of all ages. To produce reliable statistics, NHANES over-samples persons 60 and  
12 133 older, African Americans, and Hispanics (17).  
13  
14  
15  
16  
17  
18

19 135 In the present study, seven two-year cycles of NHANES survey data between 2005-2018  
20 136 (inclusive) have been retrospectively analysed for baseline demographic information, and  
21 137 drug use questionnaire data. A total of 35,212 adults (US citizens) between 18-69 years old  
22 138 participated in the seven-cycles of surveys analysed. Of these, 32.9% had missing marijuana  
23 139 survey data. Those with missing data were significantly more likely to be older ( $p<0.001$ ),  
24 140 female ( $p<0.001$ ) and have less than high school education ( $p<0.001$ ). Missing data was  
25 141 handled by pairwise deletion to optimize data available for analysis. Participants undergo a  
26 142 home interview, and a comprehensive physical examination in a mobile examination centre  
27 143 (MEC). The 2005-2018 NHANES protocol was approved by the National Centre for Health  
28 144 Statistics research ethics review board and written informed consent obtained from all  
29 145 participants.  
30  
31  
32  
33  
34

35 147 Demographics data including age, gender, race/ethnicity, education and income were  
36 148 collected during the home interview. The drug use questionnaire was conducted in the mobile  
37 149 examination centre (MEC), and aimed to assess lifetime, past-year, and current usage of  
38 150 marijuana. Questions are self-administered using the Audio Computer-Assisted Self-Interview  
39 151 (ACASI) system. The ACASI was conducted in English, Spanish, Korean, Vietnamese, or Chinese  
40 152 (Mandarin and Cantonese). Participants reported lifetime use, age at first use and use within  
41 153 the past-year of marijuana.  
42  
43  
44  
45

46 154  
47 155 Given the NHANES complex probability sampling design, 2-year interview weights computed  
48 156 by the NCHS were used to calculate prevalence estimates and 95% confidence intervals  
49 157 (Taylor linearization), age-standardized to the 2000 US Census population as recommended  
50 158 by the NCHS. Differences in prevalence estimates were compared using chi-square tests.  
51 159 Univariate regression models were used to test for significant linear trends while  
52 160 multivariable regression models were used to determine characteristics associated with  
53 161 recent marijuana use. Results at the  $p<0.05$  level considered statistically significant. Statistical  
54 162 analysis was performed using STATA version 15.0 (StataCorp LP, College Station, TX).  
55  
56  
57  
58  
59  
60

1  
2  
3 164 Patient and public involvement: Patients or the public were not involved in the development  
4 165 of the research question or study design, in the measurement of the outcomes, or in the  
5 166 dissemination of results for the present study.  
6  
7 167  
8

9 168 **Results:**

10 169  
11 170 Overall, 53.5% (95% CI 52.8-54.1%) of the US adult population reported ever using marijuana  
12 171 between 2005-2018. The prevalence of lifetime marijuana use, and first use before the age  
13 172 of 18, remained stable between 2005 and 2018 ( $p=0.53$  and  $p=0.68$ , respectively) (Table 1).  
14 173 Overall 22.6% (95% CI 22.1-23.1%) of US adults reported using marijuana within the last year.  
15 174 The weighted prevalence of past-year marijuana use increased significantly during the study  
16 175 period from 19.1% (95% CI 15.3-23.7%) in 2005/06 to 29.1% (95% CI 26.0-32.5%) ( $p=0.001$ ) in  
17 176 2017/18.  
18  
19 177

20  
21  
22 178 The prevalence of past-year marijuana use was higher among younger age groups ( $p<0.001$ ),  
23 179 males ( $p<0.05$ ), and those with income below poverty level ( $p<0.05$ ) (Table 2). Past-year  
24 180 marijuana use was more common among non-Hispanic blacks, and less common among  
25 181 Hispanic/Mexicans ( $p<0.002$  (excluding 2011/12 and 2017/18)). Between 2005 - 2018 the  
26 182 prevalence of past-year marijuana use increased among all age categories ( $p<0.001$ ), males  
27 183 and females ( $p<0.001$ ), all racial categories ( $p<0.01$  for all groups), those with high school  
28 184 education or above ( $p<0.001$  for both) and those at all levels of income ( $p<0.01$ ).  
29  
30 185

31 186 Multivariate logistic regression analysis demonstrated higher odds of past-year marijuana use  
32 187 among younger age groups ( $p<0.001$ ), males ( $p<0.001$ ), non-Hispanic blacks ( $p<0.001$ ), and  
33 188 those with income below the poverty level ( $p<0.001$  for both) (Table 3). Past-year use was  
34 189 less likely among older individuals ( $p<0.001$ ), and Hispanic and Mexican Americans ( $p<0.001$ )  
35 190 and those with higher levels of education ( $p=0.003$ ) (Table 3).  
36  
37 191  
38 192  
39  
40  
41  
42  
43

44 193 **Discussion:**

45 194  
46 195 The current study presents the most recent changes in marijuana use in the US during a period  
47 196 of particularly high legalization. It finds that while lifetime marijuana use, and first-use before  
48 197 the age of 18, has remained stable, the overall prevalence of past-year marijuana use has  
49 198 significantly increased over the 14-year period. While past-year use was still more common  
50 199 among younger age groups, males, non-Hispanic blacks and those with lower income,  
51 200 significant trends of increasing past-year use were seen in all age categories, males and  
52 201 females, all racial categories, highly-educated populations, and all income levels. Age-specific  
53 202 marijuana use trends in response to legalization laws has been studied elsewhere; but with  
54 203 inconsistent findings. There has been growing consensus that increasing recent-use of  
55 204 marijuana is seen among late to middle-aged adults after legalization (6, 13); a recent study  
56  
57  
58  
59  
60

1  
2  
3 205 by Salas-Wright and colleagues showing trends of increasing past-year use among late to  
4 206 middle-aged adults in the US between 2002-2014 (5), findings that are supported by the  
5 207 present study. Whether this pattern of recent-use among older populations is associated with  
6 208 increasing marijuana-use for medicinal purposes (seen most prominently among older, white,  
7 209 male, and high-income populations in the US) (14), is unclear, and such data was not available  
8 210 for analysis in the present study. However, there has been less consensus about recent-use  
9 211 trends among adolescent populations. While a comprehensive study by Harpin and  
10 212 colleagues described no change in adolescent-use after legalization (10) (further supported  
11 213 by more recent findings (6)), a 2019 review by Bae and colleagues described increasing recent-  
12 214 use amongst adolescents in the US after legalization (8). Contrastingly, a 2016 US study by  
13 215 Grucza and colleagues describes that past-year marijuana use actually *decreased* among  
14 216 adolescents, during the highest periods of legalization (12). Information about marijuana-use  
15 217 trends in adolescents less than 18-years-old was not publicly available on NHANES for the  
16 218 present study, but it has been noted that over the 14-year study period, there has been no  
17 219 significant change in reported first-use before the age of 18 (table 1).  
18  
19  
20  
21  
22  
23  
24  
25

26 221 Our findings of younger, male, non-Hispanic black and lower income populations being most  
27 222 likely to use marijuana overall, are also consistent with previous findings not aforementioned  
28 223 (4, 7). Native American populations, those living in urban areas, and those living in western  
29 224 states, have also been shown to be more likely to have recently used marijuana; but this  
30 225 information was not available on NHANES in sufficient detail, for the present analyses.  
31  
32  
33

34 227 In addition to demographic risk factors indicating potential marijuana use, an understanding  
35 228 of other risk factors is important for those involved in fields of public policy and healthcare.  
36 229 While age and gender remain somewhat inconsistently described risk factors, tobacco  
37 230 smoking is a demonstrated risk factor for marijuana use. Though not analyzed in the present  
38 231 study, a recent study demonstrated that current smokers have almost 6x increased odds of  
39 232 recent marijuana use compared to non-smokers (18), outlining another sub-population  
40 233 particularly at risk. Another group at risk of increasing marijuana use are non-medical users  
41 234 of prescription drugs (NMUPD). A recent study by Karjalainen and colleagues demonstrated  
42 235 significantly increasing trends of illicit drug use among NMUPD (92% of whom had used  
43 236 cannabis in the last year), that could not otherwise be explained by age or gender (19).  
44  
45  
46  
47  
48  
49

50 238 Important to consider in the context of the present findings is that marijuana-use trends may  
51 239 not to be restricted only to states with marijuana legalization. In 2017, Hasin and colleagues  
52 240 demonstrated significantly increased marijuana use both in states with and without  
53 241 marijuana legalization laws (4, 7), albeit fractionally higher in states where marijuana was  
54 242 legalized. However, a recent analysis by Han and colleagues demonstrated a significantly  
55 243 higher trend of increasing medical-marijuana use in states without legalization (AOR 1.4, 95%  
56 244 CI 1.05-1.90), compared to states with legalization (AOR 1.3, 95% CI 1.03-1.61) (14);  
57  
58  
59  
60

1  
2  
3 245 underlining the fact that evolving legalization laws are also of relevance to states where  
4 246 recreational and medical marijuana use remains illegal.

5 247  
6  
7 248 Exploring the economic and societal cost-effectiveness of marijuana legalization is also  
8  
9 249 important for those involved in healthcare policy and decision making. Marijuana legalization  
10 250 was posited to lower price, increase availability, and thereby increase marijuana use (6), with  
11 251 early fears that profit motive would take precedence over public health issues (20, 21). The  
12 252 retail price of marijuana on the legal cannabis market had sharply fallen by almost 70%, just  
13 253 three-years after legalization in Washington State (22, 23). Some reports described an initial  
14 254 increase in self-reported street prices of marijuana in response to legalization as demand  
15 255 increased, by up to 36% (24), with limited price change thereafter. However, similarly to  
16 256 results aforementioned, medical legalization appears to have affected only adult marijuana  
17 257 use, with minimal significant changes to adolescent use (13). While studies of the effect of  
18 258 recreational marijuana legalization on its use are still emerging, there appears to be  
19 259 no/minimal effect on adolescent or college marijuana use (13). The passage of legalization  
20 260 laws also offers an important social justice benefit (25); by removing mechanisms for unfair,  
21 261 damaging disparities in law enforcement (26). While more permissive marijuana laws may  
22 262 appeal to social justice aims (reducing racial disparity in law enforcement), and increase  
23 263 revenue to state and local government through taxation (6), the public health trade-offs and  
24 264 overall costs of use-related adverse physical and psychosocial consequences (27) in response  
25 265 to changing laws remains difficult to accurately describe (6).

26 266  
27 267 Strengths and Limitations: Strengths of our study include the size and heterogeneity of our  
28 268 population, the timespan, and the age-standardization of the NHANES data. Limitations to  
29 269 our study include reliance on self-reported data and reporter-bias, which may not have  
30 270 affected all demographics equally. Missing data was primarily from participants who were  
31 271 older and female, potentially underestimating the true prevalence of marijuana use among  
32 272 this demographic. Our dataset did not include youth aged 12-17 years old, a potentially at-  
33 273 risk population, nor include analysis of other risk factors associated with marijuana use (use  
34 274 of tobacco, or NMUPD). Certain ethnicity data (i.e. Native American identifiers) and  
35 275 geographical data (i.e. whether collected from states with or without legalization) were not  
36 276 available for analysis, nor was detail of marijuana use for medicinal or recreational purposes.

37 277

38 278

### 39 279 **Conclusion:**

40 280

41 281 Our primary two findings describing characteristics of those most at risk of using marijuana,  
42 282 and those where trends of use have most significantly increased, adds to the current body of  
43 283 literature and understanding of marijuana trends in the United States. Given ongoing changes  
44 284 to marijuana legalization in the US, with the evolving public perception of marijuana safety  
45 285 and accessibility, an accurate understanding of which populations are most likely to be



1  
2  
3 286 implicated, which additional predictive tools can identify those most at risk, and a balanced  
4 287 presentation of healthcare, social and economic costs of legalization, is warranted.  
5 288 Identification of these factors can help inform the decisions of healthcare policy makers and  
6 289 professionals, and facilitate a safe transition of evolving marijuana legalization and use in the  
7 290 US.  
8  
9

10 291

11 292

12  
13  
14  
15  
16  
17  
18  
19  
20  
21  
22  
23  
24  
25  
26  
27  
28  
29  
30  
31  
32  
33  
34  
35  
36  
37  
38  
39  
40  
41  
42  
43  
44  
45  
46  
47  
48  
49  
50  
51  
52  
53  
54  
55  
56  
57  
58  
59  
60

For peer review only

1  
2  
3 294 **Author statements:**

4 295

6 296 There are no competing or conflicting interests to declare by any of the authors.

7 297

8 298

10 299 **Funding:**

11 300

13 301 This research received no specific grant from any funding agency in the public, commercial or  
14 302 not-for-profit sector.

16 303

17 304

18 305 **Author contributions:**

20 306

21 307 Dr William Mitchell: Analysis plan, data interpretation, manuscript composition and editing,  
22 308 submission, correspondence

24 309

25 310 Dr Roma Bhatia: Analysis plan, data interpretation, manuscript editing

27 311

28 312 Dr Nazlee Zebardast: Analysis plan, data extraction, analysis and interpretation, manuscript  
29 313 composition

31 314

32 315

34 316 **Data Statement:**

35 317

36 318 Data is fully accessible from the following website:

38 319 <https://wwwn.cdc.gov/nchs/nhanes/default.aspx>

39 320

40 321

42

43

44

45

46

47

48

49

50

51

52

53

54

55

56

57

58

59

60

1  
2  
3 322 **References**  
4  
5 323

---

- 6 324 1. Cohn A, Johnson A, Rose S, Rath J, Villanti A. Support for Marijuana Legalization and  
7 325 Predictors of Intentions to Use Marijuana More Often in Response to Legalization Among  
8 326 U.S. Young Adults. *Substance Use and Misuse*. 2017;52(2):203-13.
- 9 327 2. Berke J, Gould S. Legal marijuana just went on sale in Illinois. Here are all the states  
10 328 where cannabis is legal *Business Insider: Business Insider*; 2020 [Available from:  
11 329 <https://www.businessinsider.com/legal-marijuana-states-2018-1>.  
12 330
- 13 331 3. State Medical Marijuana Laws: NCSL; 2019 [Available from:  
14 332 <http://www.ncsl.org/research/health/state-medical-marijuana-laws.aspx>.  
15 333
- 16 334 4. Hasin D, Saha T, Kerridge B, Goldstein R, Chou P, Zhang H, et al. Prevalence of  
17 335 Marijuana Use Disorders in the United States Between 2001–2002 and 2012–2013. *JAMA*  
18 336 *Psychiatry*. 2015;72(12):1235-42.
- 19 337 5. Salas-Wright C, Vaughn M, Cummings-Vaughn L, Holzer K, Nelson E, AbiNader M, et  
20 338 al. Trends and correlates of marijuana use among late middle-aged and older adults in the  
21 339 United States, 2002–2014. *Drug and Alcohol Dependence*. 2017;1(171):97-106.
- 22 340 6. Carliner H, Brown Q, Sarvet A, Hasin D. Cannabis use, attitudes, and legal status in  
23 341 the U.S.: A review. *Preventative Medicine*. 2017;104:13-23.
- 24 342 7. Hasin D, Sarvet A, Cerdá M, Keyes K, Stohl M, Galea S, et al. US Adult Illicit Cannabis  
25 343 Use, Cannabis Use Disorder, and Medical Marijuana Laws: 1991-1992 to 2012-2013. *JAMA*  
26 344 *Psychiatry*. 2017;74(6):579-88.
- 27 345 8. Bae H, Kerr D. Marijuana use trends among college students in states with and  
28 346 without legalization of recreational use: initial and longer-term changes from 2008 to 2018.  
29 347 *Addiction*. 2019.
- 30 348 9. Karjalainen K, Savonen J, Hakkarainen P. Drug Use and Drug Attitudes Among Finns -  
31 349 Drug Related Population Surveys in Finland 1992-2014. Helsinki, Finland: National Institute  
32 350 for Health and Welfare; 2016.
- 33 351 10. Harpin S, Brooks-Russell A, Ma M, James K, Levinson A. Adolescent Marijuana Use  
34 352 and Perceived Ease of Access Before and After Recreational Marijuana Implementation in  
35 353 Colorado. *Substance Use and Misuse*. 2017;53(3):451-6.
- 36 354 11. Compton W, Grant B, Colliver J, Glantz M, Stinson F. Prevalence of Marijuana Use  
37 355 Disorders in the United States 1992-1992 and 2001-2002. *JAMA Network*. 2004;291:2114-  
38 356 21.
- 39 357 12. Grucza R, Agrawal A, Krauss M, Bongu J, Plunk A, Cavazos-Rehg P, et al. Declining  
40 358 Prevalence of Marijuana Use Disorders Among Adolescents in the United States, 2002–  
41 359 2013. *J Am Acad Child Adolesc Psychiatry*. 2016;55(6).
- 42 360 13. Smart R, Pacula R. Early evidence of the impact of cannabis legalization on cannabis  
43 361 use, cannabis use disorder, and the use of other substances: Findings from state policy  
44 362 evaluations. *American Journal of Drug and Alcohol Abuse*. 2019;45(6):644-63.
- 45 363 14. Han B, Compton W, Blanco C, Jones C. Trends in and correlates of medical marijuana  
46 364 use among adults in the  
47 365 United States. *Drug and Alcohol Dependence*. 2018;186:120-9.
- 48 366 15. Shanahan M, Ritter A. Cost Benefit Analysis of Two Policy Options for Cannabis:  
49 367 Status Quo and Legalisation. *PLoS ONE*. 2014;9(4):e95569.
- 50 368 16. Tyree G, Sarkar R, Bellows B, Ellis R, Atkinson J, Marcotte T, et al. A Cost-  
51 369 Effectiveness Model for Adjunctive Smoked Cannabis in the Treatment of Chronic  
52 370 Neuropathic Pain. *Cannabis and Cannabinoid Research*. 2019;4(1):62-72.

- 1  
2  
3 369 17. National Health and Nutrition Examination Survey National Center for Health  
4 370 Statistics: Centers for Disease Control and Prevention; 2017 [Available from:  
5 371 [https://www.cdc.gov/nchs/nhanes/about\\_nhanes.htm](https://www.cdc.gov/nchs/nhanes/about_nhanes.htm).  
6 372 18. Moeller S, Fink D, Gbedemah M, Hasin D, Galea S, Zvolensky M, et al. Trends in illicit  
7 373 drug use among smokers and non-smokers in the United States, 2002–2014. *Journal of*  
8 374 *Clinical Psychiatry*. 2018;79(3).  
9 375 19. Karjalainen K, Lintonen T, Hakkarainen P. Illicit drug use is increasing among non-  
10 376 medical users of prescription drugs—Results from population-based surveys 2002–2014.  
11 377 *Drug and Alcohol Dependence*. 2017;178:430-4.  
12 378 20. Pacula R, Kilmer B, Wagenaar A, Chaloupka F, Caulkins J. Developing public health  
13 379 regulations for marijuana: lessons from alcohol and tobacco. *American Journal of Public*  
14 380 *Health*. 2014;104:1021-8.  
15 381 21. Room R. Legalizing a market for cannabis for pleasure: Colorado, Washington,  
16 382 Uruguay and beyond. *Addiction*. 2014;109:345-51.  
17 383 22. Humphreys K. How legalization caused the price of marijuana to collapse  
18 384 *Washington Post: Washington post*; 2017 [Available from:  
19 385 [https://www.washingtonpost.com/news/wonk/wp/2017/09/05/how-legalization-caused-](https://www.washingtonpost.com/news/wonk/wp/2017/09/05/how-legalization-caused-the-price-of-marijuana-to-collapse/)  
20 386 [the-price-of-marijuana-to-collapse/](https://www.washingtonpost.com/news/wonk/wp/2017/09/05/how-legalization-caused-the-price-of-marijuana-to-collapse/).  
21 387 23. Smart R, Caulkins J, Kilmer B, Davenport S, Midgette G. VARIATION IN CANNABIS  
22 388 POTENCY & PRICES IN A NEWLY-LEGAL MARKET: Evidence from 30 million cannabis sales in  
23 389 Washington State. *Addiction*. 2017;112(12):2167-77.  
24 390 24. Hunt P, Pacula R. Early Impacts of Marijuana Legalization: An Evaluation of Prices in  
25 391 Colorado and Washington. *Journal of Primary Prevention*. 2017;38(3):221-48.  
26 392 25. Jensen E, Roussel A. Field observations of the developing legal recreational cannabis  
27 393 economy in Washington State. *International Journal of Drug Policy*. 2016;33:96-101.  
28 394 26. Golub A, Johnson B, Dunlap E. The race/ethnicity disparity in misdemeanor  
29 395 marijuana arrests in New York City. *Criminology and Public Policy*. 2007;6:131-64.  
30 396 27. Hall W. Alcohol and cannabis: comparing their adverse health effects and regulatory  
31 397 regimes. *International Journal of Drug Policy*. 2017;42:57-62.  
32 398  
33  
34  
35  
36  
37  
38  
39  
40  
41  
42  
43  
44  
45  
46  
47  
48  
49  
50  
51  
52  
53  
54  
55  
56  
57  
58  
59  
60

Table 1: Prevalence of marijuana use in adults in the United States, NHANES 2005-2018

|                                 | 2005-2006 |                       | 2007-2008 |                       | 2009-2010 |                       | 2011-2012 |                       | 2013-2014 |                       | 2015-2016 |                       | 2017-2018 |                       | P     |
|---------------------------------|-----------|-----------------------|-----------|-----------------------|-----------|-----------------------|-----------|-----------------------|-----------|-----------------------|-----------|-----------------------|-----------|-----------------------|-------|
|                                 | Total N   | Prevalence % (95% CI) |       |
| <b>Lifetime use</b>             | 2922      | 61.5<br>(57.2-65.7)   | 3255      | 60.5<br>(57.2-63.7)   | 3739      | 57.2<br>(53.0-61.3)   | 3333      | 59.9<br>(56.0-63.6)   | 3690      | 59.2<br>(55.6-62.7)   | 3422      | 57.3<br>(53.1-61.5)   | 3199      | 60.9<br>(57.9-63.7)   | 0.53  |
| <b>Age &lt;18 at First used</b> | 1617      | 59.6<br>(56.7-62.7)   | 1799      | 60.7<br>(58.0-63.5)   | 1937      | 62.7<br>(59.0-66.4)   | 1770      | 60.1<br>(56.0-64.0)   | 1984      | 61.4<br>(58.8-63.9)   | 1715      | 60.1<br>(56.5-63.7)   | 1737      | 61.8<br>(57.1-66.3)   | 0.68  |
| <b>Past-year use</b>            | 2922      | 19.1<br>(15.3-23.7)   | 3255      | 19.1<br>(17.5-20.7)   | 3739      | 20.6<br>(18.2-23.3)   | 3333      | 22.4<br>(19.8 - 25.2) | 3690      | 22.3<br>(19.9-24.8)   | 3422      | 24.9<br>(20.0-30.6)   | 3199      | 29.1<br>(26.0-32.5)   | 0.001 |

*Key:*

N denotes unweighted total number of participants in each category

Prevalence percentage with 95% (CI), computed using 2-year MEC weights to provide estimates for the total US population, and age-standardized to 2000 Census population.

P values test overall trend in prevalence estimates in each category

NHANES = National Health and Nutrition Examination Survey

Table 2: Prevalence of self-reported past-year marijuana use in adults in the United States, by selected demographic factors, NHANES 2005-2018

|                    | 2005-2006                               | 2007-2008                   | 2009-2010                   | 2011-2012                   | 2013-2014                   | 2015-2016                   | 2017-2018                   | P value              |
|--------------------|-----------------------------------------|-----------------------------|-----------------------------|-----------------------------|-----------------------------|-----------------------------|-----------------------------|----------------------|
|                    | Prevalence %<br>(95% CI)                | Prevalence %<br>(95% CI)    | Prevalence %<br>(95% CI)    | Prevalence %<br>(95% CI)    | Prevalence %<br>(95% CI)    | Prevalence %<br>(95% CI)    | Prevalence %<br>(95% CI)    |                      |
| <b>Age</b>         |                                         |                             |                             |                             |                             |                             |                             |                      |
| - 18-29            | 34.0 <sup>a</sup> (26.7-42.0)           | 35.1 (30.0-40.6)            | 34.4 (30.7-38.3)            | 36.2 (31.7-41.1)            | 38.1 (35.1-41.2)            | 37.3 (30.4-44.8)            | 46.3 (42.5-50.2)            | P=0.001 <sup>c</sup> |
| - 30-49            | 16.1 (12.3-20.7)                        | 16.2 (14.3-18.2)            | 17.5 (14.7-20.7)            | 17.0 (14.4-20.1)            | 16.3 (13.8-19.1)            | 21.1 (16.0-27.3)            | 24.6 (20.6-29.1)            | P=0.001              |
| - 50-69            | 10.5 (7.4-14.6)<br>P<0.001 <sup>b</sup> | 8.1 (6.0-10.9)<br>P<0.001   | 10.3 (7.8-13.4)<br>P<0.001  | 15.5 (11.4-20.8)<br>P<0.001 | 14.3 (9.2-21.5)<br>P<0.001  | 18.0 (13.0-23.7)<br>P<0.001 | 17.0 (12.4-22.8)<br>P<0.001 | P<0.001              |
| <b>Gender</b>      |                                         |                             |                             |                             |                             |                             |                             |                      |
| - Male             | 24.8 (20.3-29.9)                        | 23.1 (20.8-25.7)            | 24.8 (22.0-27.8)            | 27.3 (24.6-30.1)            | 26.3 (23.2-29.7)            | 29.2 (23.1-36.3)            | 32.0 (28.6-35.6)            | P=0.001              |
| - Female           | 13.6 (10.1-18.1)<br>P<0.001             | 15.1 (13.1-17.3)<br>P<0.001 | 16.3 (13.6-19.3)<br>P<0.001 | 17.3 (14.0-21.2)<br>P<0.001 | 18.2 (15.3-21.6)<br>P=0.001 | 20.6 (16.5-25.4)<br>P<0.001 | 26.3 (22.1-31.0)<br>P=0.02  | P<0.001              |
| <b>Race</b>        |                                         |                             |                             |                             |                             |                             |                             |                      |
| - NH White         | 20.1 (15.6-25.7)                        | 19.4 (17.7-21.3)            | 21.1 (18.4-24.1)            | 22.7 (19.4-26.3)            | 22.0 (18.3-26.3)            | 26.7 (20.4-34.1)            | 30.0 (25.5-34.5)            | P<0.001              |
| - NH Black         | 23.56 (18.4-29.1)                       | 26.9 (22.6-31.7)            | 27.6 (24.6-30.9)            | 27.3 (22.1-33.2)            | 32.9 (29.8-36.1)            | 32.5 (28.8-36.5)            | 36.8 (32.5-41.3)            | P<0.001              |
| - Hispanic/Mexican | 11.7 (8.3-16.2)                         | 13.6 (9.8-18.5)             | 16.6 (13.0-20.9)            | 18.9 (15.2-23.2)            | 17.9 (15.5-20.6)            | 16.3 (13.1-20.2)            | 25.0 (22.2-28.1)            | P<0.001              |
| - Other            | 13.2(7.9-21.2)<br>P=0.003               | 13.3 (7.5-22.6)<br>P=0.002  | 12.7 (7.4-21.1)<br>P<0.001  | 18.7 (14.2-24.1)<br>P=0.06  | 18.0 (13.7-23.3)<br>P<0.001 | 19.9 (13.3-28.7)<br>P=0.001 | 22.9 (18.3-28.3)<br>P=0.002 | P=0.003              |
| <b>Education</b>   |                                         |                             |                             |                             |                             |                             |                             |                      |
| - <High School     | 22.5 (16.5-30.0)                        | 22.1 (17.6-27.3)            | 23.3 (19.5-27.6)            | 27.5 (22.6-33.0)            | 27.9 (23.6-32.6)            | 24.7 (20.0-30.1)            | 27.8 (23.3-32.8)            | P=0.06               |
| - High School      | 21.6 (15.1-30.0)                        | 19.6 (17.5-21.8)            | 24.7 (21.2-28.5)            | 25.8 (20.8-31.5)            | 25.4 (21.1-30.3)            | 27.5 (22.3-33.4)            | 34.1 (28.1-40.6)            | P<0.001              |
| - >High School     | 17.4 (13.2-22.7)<br>P=0.25              | 18.0 (15.4-20.8)<br>P=0.21  | 18.2 (15.1-21.9)<br>P=0.006 | 20.2 (17.2-23.4)<br>P=0.01  | 19.8 (16.9-23.0)<br>P=0.01  | 24.1 (18.2-31.3)<br>P=0.42  | 27.1 (23.4-31.2)<br>P=0.05  | P<0.001              |
| <b>Poverty</b>     |                                         |                             |                             |                             |                             |                             |                             |                      |
| - >2x PL           | 17.7 (13.5-22.8)                        | 16.3 (14.4-18.5)            | 17.1 (14.2-20.5)            | 18.3 (15.6-21.3)            | 18.5 (15.7-21.6)            | 22.4 (17.3-28.4)            | 26.3 (22.2-30.8)            | P=0.001              |
| - 1-2X PL          | 22.0 (16.4-28.8)                        | 24.5 (20.8-28.6)            | 22.4 (18.0-27.7)            | 27.9 (23.8-32.3)            | 25.3 (21.6-29.5)            | 29.4 (21.8-38.4)            | 32.1 (28.3-36.2)            | P=0.002              |
| - < PL             | 24.3 (19.2-30.2)<br>P=0.05              | 25.2 (19.5-32.0)<br>P=0.001 | 34.6 (30.9-38.6)<br>P<0.001 | 31.1 (27.1-35.4)<br>P<0.001 | 33.2 (28.3-38.6)<br>P<0.001 | 29.8 (23.6-37.0)<br>P=0.004 | 37.0 (32.2-42.1)<br>P=0.001 | P=0.002              |

Key:  
Prevalence percentage with 95% confidence intervals (CI), computed using 2-year interview weights to provide estimates for the total US population and are age-standardized to the US 2000 Census population.

<sup>a</sup> percentage interpretation: of those aged 18-29, 34% reported marijuana use within the past 12 months. Poverty defined using poverty income ratio, accounting for family size

<sup>b</sup> P values test global within group differences in prevalence

<sup>c</sup> P values test overall trend in prevalence estimates in each category

NH = Non-Hispanic

PL = Poverty Level

NHANES = National Health and Nutrition Examination Survey

Table 3: Adjusted odds of past-year marijuana use in adults in the United States, NHANES 2005-2018

| Demographic variable       | Past-year marijuana use<br>OR (95% CI) | P value |
|----------------------------|----------------------------------------|---------|
| <b>Age of participants</b> |                                        |         |
| - 18-29                    | 1.0 (reference)                        |         |
| - 30-49                    | 0.39 (0.36-0.43)                       | P<0.001 |
| - 50-69                    | 0.26 (0.22-0.30)                       | P<0.001 |
| <b>Gender</b>              |                                        |         |
| - Female                   | 1.0 (reference)                        |         |
| - Male                     | 1.67 (1.55-1.81)                       | P<0.001 |
| <b>Race</b>                |                                        |         |
| - Non-Hispanic White       | 1.0 (reference)                        |         |
| - Non-Hispanic Black       | 1.23 (1.09-1.39)                       | P=0.001 |
| - Hispanic/Mexican         | 0.51 (0.44-0.58)                       | P<0.001 |
| - Other                    | 0.63 (0.54-0.73)                       | P<0.001 |
| <b>Education</b>           |                                        |         |
| - < High School            | 1.0 (reference)                        |         |
| - High School              | 0.95 (0.81-1.12)                       | P=0.58  |
| - > High School            | 0.82 (0.73-0.93)                       | P=0.003 |
| <b>Poverty</b>             |                                        |         |
| - >2x Poverty Level        | 1.0 (reference)                        |         |
| - 1-2X Poverty Level       | 1.41 (1.24-1.59)                       | P<0.001 |
| - < Poverty Level          | 1.69 (1.49-1.92)                       | P<0.001 |
| <b>Year of survey</b>      | 1.10 (1.05-1.14)                       | P<0.001 |

*Key:*

Odds ratio (OR) with 95% confidence intervals (CI) computed using 12-year interview weights to provide estimates for the total US population and are age-standardized to the US 2000 Census population.

Poverty defined using poverty income ratio, which accounts for family size

Year covariate modelled as a continuous variable

NHANES = National Health and Nutrition Examination Survey

1  
2  
3  
4  
5  
6  
7  
8  
9  
10  
11  
12  
13  
14  
15  
16  
17  
18  
19  
20  
21  
22  
23  
24  
25  
26  
27  
28  
29  
30  
31  
32  
33  
34  
35  
36  
37  
38  
39  
40  
41  
42  
43  
44  
45  
46

For peer review only



STROBE Statement—Checklist of items that should be included in reports of *cross-sectional studies*

|                              | Item | Recommendation                                                                                                                                                                                               | Page |
|------------------------------|------|--------------------------------------------------------------------------------------------------------------------------------------------------------------------------------------------------------------|------|
| <b>Title and abstract</b>    | 1    | (a) Indicate the study's design with a commonly used term in the title or the abstract                                                                                                                       | 1    |
|                              |      | (b) Provide in the abstract an informative and balanced summary of what was done and what was found                                                                                                          | 2    |
| <b>Introduction</b>          |      |                                                                                                                                                                                                              |      |
| Background/rationale         | 2    | Explain the scientific background and rationale for the investigation being reported                                                                                                                         | 4    |
| Objectives                   | 3    | State specific objectives, including any prespecified hypotheses                                                                                                                                             | 4    |
| <b>Methods</b>               |      |                                                                                                                                                                                                              |      |
| Study design                 | 4    | Present key elements of study design early in the paper                                                                                                                                                      | 5    |
| Setting                      | 5    | Describe the setting, locations, and relevant dates, including periods of recruitment, exposure, follow-up, and data collection                                                                              | 5    |
| Participants                 | 6    | (a) Give the eligibility criteria, and the sources and methods of selection of participants                                                                                                                  | 5    |
| Variables                    | 7    | Clearly define all outcomes, exposures, predictors, potential confounders, and effect modifiers. Give diagnostic criteria, if applicable                                                                     | 5    |
| Data sources/<br>measurement | 8*   | For each variable of interest, give sources of data and details of methods of assessment (measurement). Describe comparability of assessment methods if there is more than one group                         | 5    |
| Bias                         | 9    | Describe any efforts to address potential sources of bias                                                                                                                                                    | 5    |
| Study size                   | 10   | Explain how the study size was arrived at                                                                                                                                                                    | 5    |
| Quantitative variables       | 11   | Explain how quantitative variables were handled in the analyses. If applicable, describe which groupings were chosen and why                                                                                 | 5    |
| Statistical methods          | 12   | (a) Describe all statistical methods, including those used to control for confounding                                                                                                                        | 5    |
|                              |      | (b) Describe any methods used to examine subgroups and interactions                                                                                                                                          | 5    |
|                              |      | (c) Explain how missing data were addressed                                                                                                                                                                  | 5    |
|                              |      | (d) If applicable, describe analytical methods taking account of sampling strategy                                                                                                                           | 5    |
|                              |      | (e) Describe any sensitivity analyses                                                                                                                                                                        | -    |
| <b>Results</b>               |      |                                                                                                                                                                                                              |      |
| Participants                 | 13*  | (a) Report numbers of individuals at each stage of study—eg numbers potentially eligible, examined for eligibility, confirmed eligible, included in the study, completing follow-up, and analysed            | 5, 6 |
|                              |      | (b) Give reasons for non-participation at each stage                                                                                                                                                         | -    |
|                              |      | (c) Consider use of a flow diagram                                                                                                                                                                           | -    |
| Descriptive data             | 14*  | (a) Give characteristics of study participants (eg demographic, clinical, social) and information on exposures and potential confounders                                                                     | 6    |
|                              |      | (b) Indicate number of participants with missing data for each variable of interest                                                                                                                          | 5    |
| Outcome data                 | 15*  | Report numbers of outcome events or summary measures                                                                                                                                                         | 6    |
| Main results                 | 16   | (a) Give unadjusted estimates and, if applicable, confounder-adjusted estimates and their precision (eg, 95% confidence interval). Make clear which confounders were adjusted for and why they were included | 6    |

|                          |    |                                                                                                                                                                            |      |
|--------------------------|----|----------------------------------------------------------------------------------------------------------------------------------------------------------------------------|------|
|                          |    | (b) Report category boundaries when continuous variables were categorized                                                                                                  | 6    |
|                          |    | (c) If relevant, consider translating estimates of relative risk into absolute risk for a meaningful time period                                                           | -    |
| Other analyses           | 17 | Report other analyses done—eg analyses of subgroups and interactions, and sensitivity analyses                                                                             | 6    |
| <b>Discussion</b>        |    |                                                                                                                                                                            |      |
| Key results              | 18 | Summarise key results with reference to study objectives                                                                                                                   | 6, 7 |
| Limitations              | 19 | Discuss limitations of the study, taking into account sources of potential bias or imprecision. Discuss both direction and magnitude of any potential bias                 | 8    |
| Interpretation           | 20 | Give a cautious overall interpretation of results considering objectives, limitations, multiplicity of analyses, results from similar studies, and other relevant evidence | 8    |
| Generalisability         | 21 | Discuss the generalisability (external validity) of the study results                                                                                                      | 8    |
| <b>Other information</b> |    |                                                                                                                                                                            |      |
| Funding                  | 22 | Give the source of funding and the role of the funders for the present study and, if applicable, for the original study on which the present article is based              | 10   |

\*Give information separately for exposed and unexposed groups.

**Note:** An Explanation and Elaboration article discusses each checklist item and gives methodological background and published examples of transparent reporting. The STROBE checklist is best used in conjunction with this article (freely available on the Web sites of PLoS Medicine at <http://www.plosmedicine.org/>, Annals of Internal Medicine at <http://www.annals.org/>, and Epidemiology at <http://www.epidem.com/>). Information on the STROBE Initiative is available at [www.strobe-statement.org](http://www.strobe-statement.org).
